# Supplementary material for: High-resolution spatiotemporal measurement of air and environmental noise pollution in Sub-Saharan African cities: Pathways to Equitable Health Cities Study protocol for Accra, Ghana
Source: PubMed Central journal article supplement (PMC7440835; doi:10.1136/bmjopen-2019-035798), 2020-08-20
Supplement: bmjopen-2019-035798.draft_revisions.pdf [file bmjopen-2019-035798.draft_revisions.pdf]

# BMJ Open

BMJ Open is committed to open peer review. As part of this commitment we make the peer review history of every article we publish publicly available.

When an article is published we post the peer reviewers' comments and the authors' responses online. We also post the versions of the paper that were used during peer review. These are the versions that the peer review comments apply to.

The versions of the paper that follow are the versions that were submitted during the peer review process. They are not the versions of record or the final published versions. They should not be cited or distributed as the published version of this manuscript.

BMJ Open is an open access journal and the full, final, typeset and author-corrected version of record of the manuscript is available on our site with no access controls, subscription charges or pay-per-view fees (<http://bmjopen.bmj.com>).

If you have any questions on BMJ Open's open peer review process please email [info.bmjopen@bmj.com](mailto:info.bmjopen@bmj.com)

# BMJ Open

## High-resolution assessment of air and environmental noise pollution in sub-Saharan African cities: Pathways to Equitable Health Cities Study protocol for Accra, Ghana

|                               |                                                                                                                                                                                                                                                                                                                                                                                                                                                                                                                                                                                                                                                                                                                                                                                                                                                                                                                                                                                                                                                                                                                                                                                                                                                                                                                                                                                                                                                                                                                                                                                                                                                                                                                                                                                                                                                                                                                                                                                    |
|-------------------------------|------------------------------------------------------------------------------------------------------------------------------------------------------------------------------------------------------------------------------------------------------------------------------------------------------------------------------------------------------------------------------------------------------------------------------------------------------------------------------------------------------------------------------------------------------------------------------------------------------------------------------------------------------------------------------------------------------------------------------------------------------------------------------------------------------------------------------------------------------------------------------------------------------------------------------------------------------------------------------------------------------------------------------------------------------------------------------------------------------------------------------------------------------------------------------------------------------------------------------------------------------------------------------------------------------------------------------------------------------------------------------------------------------------------------------------------------------------------------------------------------------------------------------------------------------------------------------------------------------------------------------------------------------------------------------------------------------------------------------------------------------------------------------------------------------------------------------------------------------------------------------------------------------------------------------------------------------------------------------------|
| Journal:                      | <i>BMJ Open</i>                                                                                                                                                                                                                                                                                                                                                                                                                                                                                                                                                                                                                                                                                                                                                                                                                                                                                                                                                                                                                                                                                                                                                                                                                                                                                                                                                                                                                                                                                                                                                                                                                                                                                                                                                                                                                                                                                                                                                                    |
| Manuscript ID                 | bmjopen-2019-035798                                                                                                                                                                                                                                                                                                                                                                                                                                                                                                                                                                                                                                                                                                                                                                                                                                                                                                                                                                                                                                                                                                                                                                                                                                                                                                                                                                                                                                                                                                                                                                                                                                                                                                                                                                                                                                                                                                                                                                |
| Article Type:                 | Protocol                                                                                                                                                                                                                                                                                                                                                                                                                                                                                                                                                                                                                                                                                                                                                                                                                                                                                                                                                                                                                                                                                                                                                                                                                                                                                                                                                                                                                                                                                                                                                                                                                                                                                                                                                                                                                                                                                                                                                                           |
| Date Submitted by the Author: | 15-Nov-2019                                                                                                                                                                                                                                                                                                                                                                                                                                                                                                                                                                                                                                                                                                                                                                                                                                                                                                                                                                                                                                                                                                                                                                                                                                                                                                                                                                                                                                                                                                                                                                                                                                                                                                                                                                                                                                                                                                                                                                        |
| Complete List of Authors:     | <p>Clark, Sierra; Imperial College London, School of Public Health<br/> Alli, Abosede; University of Massachusetts Amherst, Department of Environmental Health Sciences<br/> Brauer, Michael; The University of British Columbia, School of Population and Public Health<br/> Ezzati, Majid; Imperial College London, School of Public Health; Imperial College London, MRC-PHE Center for Environment and Health<br/> Baumgartner, Jill ; McGill University, Institute for Health and Social Policy; McGill University, Department of Epidemiology, Biostatistics, and Occupational Health<br/> Toledano, Mireille; Imperial College London, School of Public Health; Imperial College London, MRC-PHE Center for Environment and Health<br/> Hughes, Allison; University of Ghana, Department of Physics<br/> Moses, Josephine; University of Ghana, Department of Physics<br/> Terkperley, Solomon; University of Ghana, Department of Physics<br/> Nimo, James; University of Ghana, Department of Physics<br/> Vallarino, Jose; Harvard University, T.H. Chan School of Public Health<br/> Agyei-Mensah, Samuel; University of Ghana, Department of Geography and Resource Development<br/> Agyemang, Ernest; University of Ghana, Department of Geography and Resource Development<br/> Nathvani, Ricky; Imperial College London, School of Public Health<br/> Muller, Emily; Imperial College London, School of Public Health<br/> Wang, Jiayuan; University of Massachusetts Amherst, Department of Environmental Health Sciences<br/> Beddows, Andrew; King's College London, Department of Analytical, Environmental and Forensic Sciences<br/> Kelly, Frank; King's College London, Department of Analytical, Environmental and Forensic Sciences<br/> Barratt, Benjamin; King's College London, Department of Analytical, Environmental and Forensic Sciences<br/> Arku, Raphael; University of Massachusetts Amherst, Department of Environmental Health Sciences</p> |
| Keywords:                     | STATISTICS & RESEARCH METHODS, EPIDEMIOLOGY, PUBLIC HEALTH                                                                                                                                                                                                                                                                                                                                                                                                                                                                                                                                                                                                                                                                                                                                                                                                                                                                                                                                                                                                                                                                                                                                                                                                                                                                                                                                                                                                                                                                                                                                                                                                                                                                                                                                                                                                                                                                                                                         |
|                               |                                                                                                                                                                                                                                                                                                                                                                                                                                                                                                                                                                                                                                                                                                                                                                                                                                                                                                                                                                                                                                                                                                                                                                                                                                                                                                                                                                                                                                                                                                                                                                                                                                                                                                                                                                                                                                                                                                                                                                                    |

1  
2  
3  
4  
5  
6  
7  
8  
9  
10  
11  
12  
13  
14  
15  
16  
17  
18  
19  
20  
21  
22  
23  
24  
25  
26  
27  
28  
29  
30  
31  
32  
33  
34  
35  
36  
37  
38  
39  
40  
41  
42  
43  
44  
45  
46  
47  
48  
49  
50  
51  
52  
53  
54  
55  
56  
57  
58  
59  
60

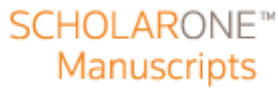

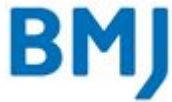

I, the Submitting Author has the right to grant and does grant on behalf of all authors of the Work (as defined in the below author licence), an exclusive licence and/or a non-exclusive licence for contributions from authors who are: i) UK Crown employees; ii) where BMJ has agreed a CC-BY licence shall apply, and/or iii) in accordance with the terms applicable for US Federal Government officers or employees acting as part of their official duties; on a worldwide, perpetual, irrevocable, royalty-free basis to BMJ Publishing Group Ltd ("BMJ") its licensees and where the relevant Journal is co-owned by BMJ to the co-owners of the Journal, to publish the Work in this journal and any other BMJ products and to exploit all rights, as set out in our [licence](#).

The Submitting Author accepts and understands that any supply made under these terms is made by BMJ to the Submitting Author unless you are acting as an employee on behalf of your employer or a postgraduate student of an affiliated institution which is paying any applicable article publishing charge ("APC") for Open Access articles. Where the Submitting Author wishes to make the Work available on an Open Access basis (and intends to pay the relevant APC), the terms of reuse of such Open Access shall be governed by a Creative Commons licence – details of these licences and which [Creative Commons](#) licence will apply to this Work are set out in our licence referred to above.

Other than as permitted in any relevant BMJ Author's Self Archiving Policies, I confirm this Work has not been accepted for publication elsewhere, is not being considered for publication elsewhere and does not duplicate material already published. I confirm all authors consent to publication of this Work and authorise the granting of this licence.

1  
2 **High-resolution assessment of air and environmental noise pollution in sub-Saharan African**  
3 **cities: Pathways to Equitable Health Cities Study protocol for Accra, Ghana**  
4

5 Sierra N Clark <sup>a</sup>, Abosede S Alli <sup>b</sup>, Michael Brauer <sup>c</sup>, Majid Ezzati <sup>a,d</sup>, Jill Baumgartner <sup>e,f</sup>, Mireille  
6 Toledano <sup>a,d</sup>, Allison Hughes <sup>g</sup>, Josephine Moses <sup>g</sup>, Solomon Terkperterey <sup>g</sup>, James Nimo <sup>g</sup>, Jose  
7 Vallarino <sup>h</sup>, Samuel Agyei-Mensah <sup>i</sup>, Ernest Agyemang <sup>i</sup>, Ricky Nathvani <sup>a</sup>, Emily Muller <sup>a</sup>, Jiayuan  
8 Wang <sup>b</sup>, Andrew Beddows <sup>j</sup>, Frank Kelly <sup>j</sup>, Ben Barratt <sup>j</sup>, Raphael E Arku <sup>b,\*</sup>  
9

10  
11 <sup>a</sup> Department of Epidemiology and Biostatistics, School of Public Health, Imperial College London,  
12 London, UK

13 <sup>b</sup> Department of Environmental Health Sciences, School of Public Health and Health Sciences,  
14 University of Massachusetts, Amherst, USA

15 <sup>c</sup> School of Population and Public Health, The University of British Columbia, Vancouver, Canada

16 <sup>d</sup> MRC-PHE Center for Environment and Health, Imperial College London, London, UK

17 <sup>e</sup> Institute for Health and Social Policy, McGill University, Montreal, Canada

18 <sup>f</sup> Department of Epidemiology, Biostatistics, and Occupational Health, McGill University, Montreal,  
19 Canada  
20

21 <sup>g</sup> Department of Physics, University of Ghana, Legon, Ghana

22 <sup>h</sup> Harvard T.H. Chan School of Public Health, Boston, MA, USA

23 <sup>i</sup> Department of Geography and Resource Development, University of Ghana, Legon, Ghana

24 <sup>j</sup> Department of Analytical, Environmental and Forensic Sciences, King's College London, London,  
25 UK  
26  
27

28  
29 **\*Corresponding author:**

30 Raphael E Arku

31 School of Public Health and Health Sciences

32 University of Massachusetts

33 Amherst, MA, USA

34 E-mail: rarku@umass.edu  
35  
36  
37

38 **Word count:** 4121 words (excluding title page, abstract, references, figures and tables)  
39  
40  
41  
42  
43  
44  
45  
46  
47  
48  
49  
50  
51  
52  
53  
54  
55  
56  
57  
58  
59  
60

## ABSTRACT

**Introduction:** Air and noise pollution are emerging environmental health hazards in African cities, with potentially complex spatial and temporal patterns. Limited local data is a barrier to the formulation and evaluation of policies to reduce air and noise pollution.

**Methods and analysis:** We designed a year-long measurement campaign to characterize air and noise pollution and their sources at high-resolution within the Greater Accra Metropolitan Area, Ghana. We will deploy low-cost, low-power, lightweight monitoring devices that are robust, socially unobtrusive, and able to function in the SSA climate. Our design utilizes a combination of fixed (year-long,  $n = 10$ ) and rotating (week-long,  $n = \sim 130$ ) sites, selected to represent a range of land uses and source influences (e.g. background, road-traffic, commercial, industrial, and residential areas, and various neighbourhood socioeconomic classes). We will collect data on fine particulate matter ( $PM_{2.5}$ ), nitrogen oxides ( $NO_x$ ), weather variables, sound (noise levels and audio), and street-level time-lapse images. We will use state-of-the-art methods, including spatial statistics, deep/machine learning, and processed-based emissions modelling, to capture highly resolved temporal and spatial variations in pollution levels across Accra and to identify their potential sources. This protocol can serve as a prototype for pollution monitoring in other rapidly growing Sub-Saharan African cities.

**Ethics and dissemination:** This environmental study was deemed exempt from full ethics review at Imperial College London and the University of Massachusetts Amherst; it was approved by the University of Ghana Ethics Committee. This protocol is designed to be implementable in Sub-Saharan African cities to map environmental pollution to inform urban planning decisions to reduce health harming exposures to air and noise pollution. It will be disseminated through local stakeholder engagement (public and private sectors), peer-reviewed publications, contribution to policy documents, media, and conference presentations.

**Key words:** Air pollution, noise pollution, environmental monitoring, environmental modelling, machine learning, urban health, health inequality, sub-Saharan Africa

## STRENGTHS AND LIMITATIONS OF THE STUDY

- Our study is the largest air and noise pollution measurement campaign conducted in a major SSA city and serves as a prototype for data-poor SSA cities.
- The study relies on new sensor technologies to generate rich datasets on air and noise pollution levels along with street-level imagery and sound types that help identify sources across over 140 locations.
- Data from a combination of fixed (1 year) and rotating (7 day) monitoring sites representing various land-use types will allow for an assessment of both the temporal and spatial variability of pollution.
- While our study makes use of next-generation low-cost technologies, significant need for human resources is required for site identification and preparation, equipment deployment and maintenance, and data download and management.

## INTRODUCTION

Sub-Saharan Africa (SSA) is the world's fastest urbanising region, with the number of urban dwellers having increased by over 400% since 1980 [1]. Urban growth in SSA has been largely unplanned especially in relation to housing, transport and energy. As a result, air and noise pollution are increasingly a public health concern for SSA urban residents [2–4]. For example, estimates from global models suggest that ambient fine particulate matter (Particulate Matter with diameter <2.5 micrometers (PM<sub>2.5</sub>)) in SSA is well above levels in high-income North America and Western Europe [3,5]. The data from the few available measurement studies show that only about 10% of cities in SSA are meeting the WHO annual average Air Quality Guideline of 10 µg/m<sup>3</sup> [5,6]. Furthermore, the estimated annual number of deaths in some major SSA cities from PM<sub>2.5</sub> pollution in 2016 was as high as 5,640 to 520 in Johannesburg (South Africa), Lagos (Nigeria), Kinshasa (Democratic Republic of Congo), Dar es Salaam (Tanzania), Accra (Ghana), and Nairobi (Kenya) [7]. While such global estimates and the limited measurement data provide a broad view of air pollution, they do not capture the spatial variability and within-city disparities, nor do they provide information on sources [8–10]. Those within-city differences are important determinants of pollution related health inequalities. There are even less data on noise levels, and none on its health burden, and the limited data show much higher levels compared to cities in high-income countries [11–16], which may be associated with hearing loss, sleep disturbance, impaired cognitive function, and cardiovascular disease [17–19].

Air and noise pollution in SSA have a complex mix of local and regional sources: these include informal industries, transportation predominantly from old imported vehicles for commercial and private use, biomass use for household and commercial activities, household trash burning, re-suspended dust from unpaved roads, dust from regional dust storms, and noise from road-traffic, small road-side businesses, and religious practices, to name a few [4,8,10,20,21]. These sources



1  
2 influence the pollutant mixture (e.g. PM, Nitrogen Oxides (NO/NO<sub>2</sub>)) and the type of urban sounds,  
3  
4 resulting in variation in spatial patterns and potentially differential impacts on health. Carefully  
5  
6 designed measurements using low-cost robust sensors present an opportunity to provide data on air  
7  
8 and noise pollution levels, variations, and sources, to inform and evaluate effectiveness of policies in  
9  
10  
11 SSA.

12  
13  
14  
15  
16 Motivated in part by detailed air pollution data from four neighborhoods in the city core, Accra,  
17  
18 Ghana's largest city, in 2018 announced initiatives to reduce air pollution [22]; whereas noise is  
19  
20 currently making headlines in both local and international media [23–25]. Our goal is to leverage  
21  
22 advancement in sensor technology, modeling and image processing to design a measurement  
23  
24 campaign combined with machine learning, statistical, and process-based modelling to characterize  
25  
26 highly-resolved space-time variability of air and noise pollution, and their sources in the Greater  
27  
28 Accra Metropolitan Area (GAMA). This work is nested within the larger multi-country and multi-  
29  
30 city “Pathways to Equitable Healthy Cities” Study (<http://equitablehealthycities.org/>), which aims to  
31  
32 identify and inform equitable and healthy urban development and revitalization pathways in six cities  
33  
34 on four continents.  
35  
36  
37  
38  
39  
40

41 This paper details the protocol being used to collect and analyze pollution data in high resolution and  
42  
43 provides practical guideline in a rapidly growing SSA metropolitan area. As one of the few studies  
44  
45 of air and noise pollution at fine spatial resolution in an SSA city, this paper and the data to be  
46  
47 generated make three main contributions. First, to develop and implement a data-rich measurement  
48  
49 campaign on air and noise pollution in the GAMA that can provide spatially and temporally graded  
50  
51 data. Second, to present a measurement protocol that can be readily adapted to other SSA cities. Third,  
52  
53 to describe how the data will be utilized to fit and/ or validate geostatistical, machine learning, and  
54  
55 process-based dispersion models that can predict pollution levels at high-spatial and temporal  
56  
57 resolution and simulate and evaluate different policy scenarios on air quality in Accra.  
58  
59  
60

## METHODS AND ANALYSIS

### Study location and timeline

Our measurement campaign is focussed on the GAMA, which covers about 1500 km<sup>2</sup>, and consists of multiple metropolis and municipalities, with Accra Metropolitan Area (AMA) at its core (Figure 1). Accra lies in the dry equatorial climate zone with rainy (May-September) and dry Harmattan seasons characterized by dusty north-easterly trade winds from the Sahara Desert. The elevation of GAMA is near sea level. Monthly average temperatures range from 27 to 32° C with average daily humidity of 79% [26]. As Ghana's capital and largest city, Accra has become one of SSA's hubs for business, technology, communications, and education. However, there remain large inequalities in housing and possibly exposure to environmental health risks [9,27–29].

We scheduled a one-year field measurement campaign to cover the rainy and Harmattan periods. Measurements began with a 3-week long pilot campaign in April 2019 and will continue until May 2020 (Figure 2).

### Measurement campaign design

To capture the temporal (daily, weekly, seasonal) and spatial variations in both pollution and its sources across the entire study area, we are using a combination of 'fixed' and 'rotating' monitoring sites. The sites represent a blend of features such as background (e.g., low traffic and green space), low vs. high road-traffic, sparsely vs. densely built-up areas, poor vs. affluent, and established vs. emerging neighborhoods.

1  
2 Ten fixed sites have been installed and will operate continuously all year long; the sites were  
3  
4 purposefully selected based on the above criteria related to population density, road-traffic and road-  
5  
6 networks, and on neighborhood socio-economic status and biomass fuel use based on national census  
7  
8 data [30]. The sites included four locations used in an earlier air pollution study in the AMA.  
9  
10 Additional provisions have been made to co-locate with two World Bank sponsored regulatory  
11  
12 monitoring sites [27].  
13  
14  
15  
16  
17

18 To capture spatial patterns of pollution while maximizing a finite number of sensor packages, we also  
19  
20 operate sites that rotate weekly in order to capture the spatial variation in pollution levels and sources  
21  
22 but also the temporal variation within and between days. In each measurement week, samples are  
23  
24 collected at five new locations that continuously monitor for 7 days. By the end of the study, ~130  
25  
26 unique locations will be monitored for one week across the GAMA.  
27  
28  
29  
30  
31

32 In selecting the rotating site locations, we used a stratified random sampling approach. The GAMA  
33  
34 area was stratified by a 20m x 20m landcover dataset with four classes: low-density residential,  
35  
36 high-density residential, commercial and business areas, and ‘other’ areas (e.g. parks, forest,  
37  
38 agricultural areas) [31]. Sampling sites were randomly selected within strata without replacement  
39  
40 with higher probability of selecting inside the inner-city core AMA (where most of the population  
41  
42 lives). Prior to measurement, the field team conducts on-site visits to identify the appropriate sites  
43  
44 at, or as close as possible to, the computer-generated “ideal” locations. When a computer-  
45  
46 generated location is deemed unsuitable or in a restricted area (e.g. military barracks), a nearest  
47  
48 suitable spot to the ideal location is identified as a replacement.  
49  
50  
51  
52  
53  
54

## 55 **Measurement methods and equipment**

56  
57

58 We systematically selected and are employing low-cost, low-power, and lightweight monitors that  
59  
60 are robust and able to function in an environment characterized by high temperatures and humidity,

rain and dust storms, and with limited and intermittent electricity supply from the grid, and at the same time are socially unobtrusive (Table 1, Figure 3).

**Table 1. Features, dimensions, and prices of the monitors/ sensors**

| Monitor                                                | Cost per unit (USD \$) | Weight (g) | Dimensions (cm) | Battery/ power requirements  | Memory requirements              | Recording/ measurement interval | Measured parameters                                        |
|--------------------------------------------------------|------------------------|------------|-----------------|------------------------------|----------------------------------|---------------------------------|------------------------------------------------------------|
| *Ultrasonic Personal Aerosol Sampler (UPAS)            | 1200                   | 230        | 12.8x7.0x3.3    | Internal chargeable battery* | Micro SD                         | 7 days                          | PM <sub>2.5</sub> integrated (µg/m <sup>3</sup> )          |
| *ZeFan continuous PM <sub>2.5</sub> monitor            | 70                     | 150        | 10.6x6.3x2.6    | Internal chargeable battery* | Internal memory (USB connection) | 1 minute                        | PM <sub>2.5</sub> continuous (µg/m <sup>3</sup> )          |
| †Ogawa Nitrogen Dioxide (NO <sub>2</sub> /NOx) sampler | 85                     | 60         | 8.0x4.0x3.0     | NA                           | NA                               | 7 days                          | NO <sub>2</sub> (ppb) integrated; NOx (ppb) integrated     |
| Noise Sentry sound level meter                         | 306                    | 100        | 7.6x3.9 x5.9    | Internal chargeable battery  | Internal memory (USB connection) | 1 minute                        | Noise levels (dBA)                                         |
| AudioMoth audio recorder                               | 70                     | 95         | 6.2x5.0x2.2     | AA batteries                 | Micro SD                         | 10 seconds every 10 minutes     | Audio (.WAV file)                                          |
| Kestrel weather meter                                  | 310                    | 120        | 12.7x4.5x2.8    | AA batteries                 | Internal memory (USB connection) | 1 minute                        | Temperature; relative humidity; wind speed; wind direction |
| Moultrie camera trap                                   | 150                    | 500        | 13.1x8.1x6.6    | AA batteries                 | SD                               | 5 minutes                       | Time-lapse imagery (.jpeg file)                            |

dBA: Decibels A-weighted; PM<sub>2.5</sub>: Particulate matter with aerodynamic diameter less than 2.5 micrometers; ppb: parts per billion

\*UPAS and Zefan battery life can be extended using an external power bank. We used the always-on battery pack from Voltaic Systems ([www.voltaicsystems.com](http://www.voltaicsystems.com)).

†NO<sub>2</sub>/ NOx: Nitrogen Dioxide/Oxides (price includes clip, screens, plastic re-sealable pouch and reusable airtight storage and shipping vial)

## Air pollution monitors

*Integrated PM<sub>2.5</sub>*: The Ultrasonic Personal Aerosol Sampler (UPAS) [32] from Access Sensor Technologies (Fort Collins, USA) (UPAS) is a time-integrated PM<sub>2.5</sub> monitor and has a quiet solid-state miniature piezoelectric pump for drawing air through a customized cyclone onto a 37mm diameter filter media contained in barcoded cartridges within the device. With a mass flow sensor and controller, UPAS provides a steady flow rate over time. A mobile app makes UPAS easily programmable to collect samples at varying duty cycles. The UPAS devices are being operated at 1

1 liter per minute (lpm) at 50% to avoid overloading the weekly-integrated filters. The UPAS has been  
2  
3  
4 evaluated in laboratory and field settings against a federal reference monitor (URG-2000-30EGN-A;  
5  
6 URG Corp., USA), personal environmental monitor (PEM 761 - 203; SKC, Inc., USA) and Harvard  
7  
8 Impactor, respectively and has proven valid for ambient, household, and personal monitoring in a  
9  
10 typical tropical climate as our study [32–34].  
11  
12  
13  
14  
15

16 *Continuous PM<sub>2.5</sub>*: The ZeFan continuous monitor (<http://www.zfzknj.com/>) is a portable direct-  
17  
18 reading PM<sub>2.5</sub> monitor that is based on light scattering technique [35]. ZeFan uses the Plantower  
19  
20 sensor (model PMS7003) which has been validated against TEOM 1400a analyser and tested for  
21  
22 durations ranging from 6 months to a year in various environmental conditions [35,36]. Prior to field  
23  
24 deployment, we tested minute-by-minute monitor-monitor precision by running 15 monitors  
25  
26 alongside each other over a 24-hour period at the University of Ghana, Legon campus with average  
27  
28 relative humidity (RH) (~ 78%) and temperature (29 °C) representative of the city, and the  
29  
30 measurements had good agreement (Figure 4). Mid-campaign precision test will be conducted and  
31  
32 compared with the baseline data. Since light-scattering techniques only infer PM mass from detecting  
33  
34 particle number concentrations and are impacted by weather conditions (i.e. RH and temperature),  
35  
36 their estimates of mass concentration are inexact. Thus, we will co-locate the ZeFan with U.S. federal  
37  
38 equivalent continuous monitor (Teledyne Model T640x) at two sites in Accra for a week in each  
39  
40 season (dry vs. rain), up to four times a year and first adjust the minute-by-minute PM records for  
41  
42 impact of RH and then their average against the co-located integrated PM<sub>2.5</sub> concentrations from  
43  
44 UPAS.  
45  
46  
47  
48  
49  
50  
51

52 *Nitrogen Oxides (NO<sub>x</sub>/NO<sub>2</sub>)*: The Ogawa Passive Sampler (<https://ogawausa.com>) is being used to  
53  
54 measure NO<sub>x</sub> and NO<sub>2</sub>, which are inorganic gas indicators of traffic related air pollution [37] and  
55  
56 widely used in measurements to support land use regression modeling [38]. The sampler is easy to  
57  
58 deploy, reusable, and does not require electricity, thus making it a cost-effective option in SSA  
59  
60 settings. The sampler consists of two chambers with double sided diffusion that can concurrently

1  
2 capture NO<sub>x</sub> and NO<sub>2</sub> concentrations on collection pads pre-coated with 2-phenyl-4,4,5,5-  
3 tetramethylimidazoline-1-oxyl-3-oxide and triethanolamine, respectively. The samplers are covered  
4 by an opaque plastic container which serves as weather shield.  
5  
6  
7  
8  
9

## 10 Sound monitors

11  
12  
13  
14  
15  
16 *Noise levels:* The Type II Noise Sentry Sound Level Meter (SLM) datalogger (NSRT\_mk3) from  
17 Convergence Instruments, Canada is being used to measure environmental noise levels at 1-minute  
18 intervals. The Noise Sentry is a relatively low-cost SLM for capturing and constructing common  
19 metrics of environmental noise with multiple weighting curves (A, C, Z). It is small and rugged, built  
20 to withstand temperatures in the range of -20°C to 60°C, and protected against water and dust.  
21 Previous studies have used the Noise Sentry SLM in diverse settings [11,14]. Our pre-pilot tests of  
22 monitor-monitor precision using 20 monitors were high with only a 0.9 A-weighted decibel difference  
23 between the highest and lowest monitoring period means (range in mean 16-hr LAeq: 45.6 to 46.5  
24 dBA). The monitor-monitor precision test was done in Accra and SLMs were exposed 16hrs to  
25 multiple sound environments similar to what we would expect during the full monitoring campaign.  
26 Our Type II Noise Sentry SLMs were also validated in a separate aircraft noise study conducted in  
27 San Francisco against a Type I industry standard instrument (DUO 01dB) [39], and the agreement  
28 was high (mean and median second by second difference between the instruments was -0.42 and -  
29 0.38 dBA, respectively).  
30  
31  
32  
33  
34  
35  
36  
37  
38  
39  
40  
41  
42  
43  
44  
45  
46  
47  
48  
49

50 *Audio:* The AudioMoth audio recorder is a low-cost, full spectrum, acoustic logger developed by  
51 Open Acoustic Devices (Oxford, UK) [40]. The AudioMoth will complement the sound level meter  
52 by recording audio which will be used to classify different types of sounds in an urban environment  
53 (e.g., birds vs cars). The AudioMoths are set to a sampling rate of 32 kHz in our study to capture the  
54 majority of sound in the audible range [41].  
55  
56  
57  
58  
59  
60

## Weather monitors

The Kestrel 5500 weather meter (Nielsen-Kellerman Inc., Boothwyn, PA, USA) is being utilized to record weather variables every minute. The Kestrel is a hand-held environmental meter and considered tough and immune to the elements. It tracks several weather parameters, including temperature, relative humidity, and heat index. It was selected for its low power consumption, large memory capacity (>10,000 data points), and dust-and water-proof properties. Kestrel 5500 has been used in several studies in diverse settings [42,43]. According to factory specifications, the accuracy of the instrument is 0.5°C for temperature and 2% for relative humidity.

## Time-lapse cameras

To characterize sources of pollution in space and time, we use weatherproof and rugged time-lapse camera (Moultrie-50 camera trap, PERDIX wildlife, UK). The cameras are programmed to capture images at 5-minute intervals throughout the sampling period, including at night using infrared technology. Depending on the location, one or two cameras are mounted to capture multiple frames of view of potential pollution sources such as cars and community cookstoves.

## Integrated equipment monitoring box

To house the equipment, we built integrated field measurement boxes using weather protective Seahorse (SE-300) cases. The cases were designed and weather tested to securely house each piece of equipment along with battery packs inside a single compartment, and could be mounted on poles/trees of different sizes using ratchet straps. The cameras are mounted on the outside of the box with rotational multi-access brackets for ease of orientation. Additionally, soundproof foam was

1 placed in-between the air monitors and the SLM to mitigate internal sound that might be generated  
2 from the quiet air pollution monitor pumps. NO<sub>x</sub>/NO<sub>2</sub> passive samplers and the AudioMoth audio  
3 recorders are placed outside of the measurement boxes in their own smaller weather protective plastic  
4 cases.  
5  
6  
7  
8  
9

### 10 11 12 13 **Equipment deployment and data capture** 14

15  
16  
17  
18 The field team identifies potential sites at or near the computer-generated ideal locations. The team  
19 then approaches residents, owners, or managers, of property and explains the study rationale and seeks  
20 approval to install equipment for a 1-year (fixed sites) or 7-day (rotating sites) period. The team carry  
21 signed letters containing description of the research and contact information of project investigators  
22 at the University of Ghana. The site is then prepared, and the equipment box is mounted on metal  
23 poles, in care of an established contact person, and out of reach of people passing by. Depending on  
24 the specific site, the poles are secured on flat rooftops/ balconies of one-story buildings or directly in  
25 the ground (Figure 5) about 4 meters high ( $\pm 1$ m) [44] with no direct obstruction within 2 meters as  
26 is a common practice in ambient air pollution and environmental noise measurement. The cameras  
27 are mounted on the outside of the box and secured in metal cases.  
28  
29  
30  
31  
32  
33  
34  
35  
36  
37  
38  
39  
40  
41  
42

43 After deployment, the field team completes a short form, documenting information about the site,  
44 including the presence or absence of visible pollution sources (e.g., road-side cooking), mitigation  
45 factors (e.g., trees) or other points of interest, such as schools, police stations, or hospitals. For the  
46 rotating sites, the team returns seven-days after initial set-up to retrieve the equipment for data  
47 download and cleaning in the laboratory. The clean equipment is then re-deployed 48-hrs later at five  
48 new locations. For the fixed sites, replacement monitors, replacement batteries, and memory cards  
49 are swapped on site so as not to have a disruption in monitoring. Although equipment are installed in  
50 clusters of five sites at a time for efficient access, it still takes about a full working day to scout and  
51  
52  
53  
54  
55  
56  
57  
58  
59  
60



1  
2 secure five new rotating sites, and about half a day to set up/ take down a set of sites, with another  
3  
4 half a day in the lab for data download/upload and equipment preparation for the next installation.  
5  
6  
7  
8

### 9 **Logistics and training**

10  
11  
12  
13 Our local field team comprises of three recent graduates from the University of Ghana and a taxicab  
14 driver, all with technical training needed to manage the field operation. The team is given project  
15 specific training to understand the site selection criteria and to collect high quality data. Additionally,  
16 periodic field visits and regular phone calls by researchers are made to maintain high quality data. In  
17 each neighborhood or community, the team identifies and works with a community member to  
18 establish trust and facilitate entry into that community.  
19  
20  
21  
22  
23  
24  
25  
26  
27  
28  
29

### 30 **Data handling**

31  
32  
33  
34 Weekly data are downloaded, saved in triplicate onto two external hard drives, and a third copy  
35 uploaded to a sever at Imperial College via an encrypted laptop. For the integrated PM<sub>2.5</sub> filter  
36 samples, pre-labeled 0.2µm pore size 37mm barcoded Teflon membrane filters  
37 (<https://mtlcorp.com/filters/>) are used and weighed pre- and post-sampling using an MTL AH500  
38 automated robotic scale (<http://www.mtlcorp.com/#/filter-weighing/>) maintained in a temperature  
39 and RH-controlled laboratory (23 ± 2 °C, 35 ± 2% RH) at the University of British Columbia. The  
40 filter labels are scanned, time-stamped, placed in individual carriers, and loaded into the input silos  
41 for 48 hours to equilibrate to laboratory conditions before weighing. System generated weighing  
42 reports (e.g. balance stability) for each filter are issued for quality control purposes. The pre-weighed  
43 filters are scanned and paired to and placed in labeled petri-dishes which are then sealed into  
44 individual packages. Each petri-dish has four labels used to match the filter to the cartridge, UPAS  
45 monitor, and field log sheet during field work. After sampling, the filters are matched to, and placed  
46  
47  
48  
49  
50  
51  
52  
53  
54  
55  
56  
57  
58  
59  
60

1  
2 back in, their corresponding petri-dishes and shipped to the laboratory for post-weights. Detailed  
3  
4 information on the filter handling process can be found elsewhere [33]. An emerging low-cost image-  
5  
6 based approach will be applied to the post-weighed filters to estimate optical reflectance as a measure  
7  
8 of black carbon (BC) concentration [33], the mass related to light absorption due to the presence of  
9  
10 carbonaceous species.  
11  
12

13  
14  
15 NO<sub>x</sub>/NO<sub>2</sub> samples are handled according to the protocol from Ogawa [45]. After assembly in the  
16  
17 laboratory, the loaded samplers contained in an airtight container are exposed only on site for the  
18  
19 entire sampling week. After sampling, the above procedure is again followed, and samples  
20  
21 refrigerated until the exposed pads are shipped in airtight shipping vials for laboratory analysis. The  
22  
23 final sample concentrations are determined based on the ratio of the sample absorbance (measured by  
24  
25 spectrometer) to the slope of a prepared standard curve. The full analytical method is publicly  
26  
27 available [45].  
28  
29  
30  
31  
32  
33

### 34 **Quality assurance and control**

35  
36  
37  
38

39 Equipment are cleaned and prepared in a secure laboratory at the University of Ghana. The UPAS  
40  
41 mass flow sensor maintains a steady sampling flow rate over time by internal measuring changes in  
42  
43 pressure drop across the filter media (32). But as part of our quality assurance process, the flow rates  
44  
45 (1 lpm) of the UPAS monitors are checked with a TSI Mass Flowmeter (4000 Series) for possible  
46  
47 flow drift prior to and immediately after each monitoring session. The SLMs are calibrated prior to  
48  
49 each monitoring session with a CA114 sound calibrator at 94.0 dB ±0.3 dB and 1000Hz ±0.5%  
50  
51 (Convergence Instruments, Canada).  
52  
53  
54

55  
56  
57 To ensure that the air and noise monitors agree with each other throughout the full campaign (i.e.,  
58  
59 monitor-monitor agreement does not drift away through continued use), we are collecting duplicate  
60

1 samples from co-located instruments at 20% of our rotating measurement sites. The duplicates from  
2 the Zefan real-time PM<sub>2.5</sub> monitors, the sound level meters, and the integrated filter-based PM<sub>2.5</sub>  
3 monitors, will be evaluated on a minute-by-minute, 24hr, and weekly level for agreement,  
4 respectively, over a 7-day monitoring period. We also collect 20% field blanks for the integrated  
5 PM<sub>2.5</sub> and NO<sub>x</sub>/NO<sub>2</sub> samples. Blank PM<sub>2.5</sub> samples are prepared as regular samples in the clean lab,  
6 brought to the field, and deployed in the same way as the regular sample, but without the pump being  
7 turned on. NO<sub>x</sub>/NO<sub>2</sub> blanks are brought to the field sites but not exposed to air in their sealed canisters.  
8 During analysis, information from the blank samples will be used to account for residual  
9 contamination from the laboratory work, transportation, and field handling processes, which in a past  
10 study in Accra was minimal [9]. To ensure the plantower sensors in the Zefan real-time PM<sub>2.5</sub>  
11 monitors are not degrading over time and losing sensitivity in measuring peaks due to dust depositing  
12 on the sensor, light source, and mirror, we will conduct mid-campaign monitor-monitor precision and  
13 sensitivity tests by simultaneously co-locating them with U.S. federal equivalent continuous monitor  
14 (Teledyne T640x) for hourly PM<sub>2.5</sub> comparison over a one week period in the dry and rainy seasons.  
15  
16  
17  
18  
19  
20  
21  
22  
23  
24  
25  
26  
27  
28  
29  
30  
31  
32  
33  
34  
35  
36

### 37 **Modelling and analysis**

38  
39  
40  
41  
42  
43 The data from this measurement campaign will serve as inputs into a diverse suite of state-of-the-art  
44 statistical models and machine learning approaches to (i) predict pollution levels in high spatial and  
45 temporal resolution across the GAMA, (ii) identify sources of pollution, and (iii) simulate the impacts  
46 of policy scenarios on pollution levels. Below are brief descriptions of some of our planned modelling  
47 and analysis activities following data collection. Future results-based papers will describe the  
48 modelling approaches in greater detail.  
49  
50  
51  
52  
53  
54  
55  
56  
57  
58

59 High-resolution estimates of air and noise pollution in the GAMA  
60

1  
2 The increasing availability of geospatial datasets with land use characteristics [46], road network  
3 information [47], and points of interest (e.g., locations of schools and hospitals), supports the  
4 development of land use regression (LUR) models to predict pollution levels for urban areas [48,49].  
5  
6 To date, most applications of LUR models for air and noise pollution have been in high income  
7  
8 countries [14,15,48], with an emerging number in Asian cities and a limited number in African cities  
9  
10 [11,38,50,51]. To provide high spatiotemporal resolution maps of air and noise pollution in the  
11  
12 GAMA, we will build multiple space-time LUR models using year-long data on PM<sub>2.5</sub>, BC, NO<sub>2</sub>, and  
13  
14 NO<sub>x</sub> concentrations, and noise pollution indicators (i.e., Equivalent Continuous Sound levels (LAeq),  
15  
16 Intermittency Ratios (IR)). The combination of minute-by-minute data and its aggregates in hourly,  
17  
18 daily, and weekly will allow modelling spatial and temporal variability at different scales and  
19  
20 characterising within- and between-day variations. We will obtain predictor variables from publicly  
21  
22 available sources (e.g. OpenStreetMap), government databases, and satellite imagery to collate data  
23  
24 on transportation networks (e.g., road-classes, traffic density), land cover/ land use, points of interest  
25  
26 (e.g., schools, hospitals), green and blue spaces, and other environmental variables, such as  
27  
28 meteorological conditions from our installed weather stations. Appropriate data checks will be done  
29  
30 to ensure that model assumptions are met along with cross validation methods to assess model  
31  
32 performance in different parts of the city.  
33  
34  
35  
36  
37  
38  
39  
40  
41  
42

43 Identification of sources of air and noise pollution with imagery  
44  
45  
46  
47

48 In addition to the LUR models, we will glean insights into determinants of air and noise pollution  
49  
50 (i.e., potential sources) in both space and time by applying novel machine learning approaches to our  
51  
52 street-view time-lapse images collected at the measurement sites [52]. We will use "Object Detection"  
53  
54 algorithms, which build on Convolution Neural Network (CNN) architecture to identify predefined  
55  
56 object classes within an image with a rectangular box bounding their presence (Figure 6). We will  
57  
58 modify pre-existing algorithms to include custom object classes specific to our study context such as  
59  
60

1 roadside cookstoves and street loudspeakers [53–56]. Specifically, a team of researchers from London  
2 and Ghana will label a subset of images (~1000) with these custom classes which will act as a training  
3 dataset. Applying such methods to the images can create a temporal catalogue of a diverse set of  
4 objects present each location, which could then be used to predict and model pollutant levels in both  
5 space and time.  
6  
7  
8  
9  
10  
11  
12  
13  
14  
15

16 Similarly, CNN models like the CityNet model can be applied to the audio data to classify different  
17 sound types and identify noise pollution sources. The development of CityNet and other sound  
18 classifiers highlight recent advancements in this field, however, the transferability of the available  
19 models (which have predominantly been trained on data from high-income cities [41,57]) to a setting  
20 such as Accra will have to be tested and understood before put to use.  
21  
22  
23  
24  
25  
26  
27  
28  
29

### 30 Air pollution impacts of policy and urban planning

31  
32  
33  
34 We plan to use deterministic process-based models of air pollution to estimate the air pollution  
35 impacts of policies and urban planning decisions in Accra. Process based models such as  
36 meteorological chemical transport and dispersion models [58–60] can provide quantitative estimates  
37 of the air pollution impacts of different policy scenarios by modifying sources according to the  
38 specific scenario. The deterministic relationships between the model's inputs and outputs will be used  
39 in conjunction with the measurement data to calibrate the highly uncertain SSA emissions input data.  
40  
41  
42  
43  
44  
45  
46  
47  
48  
49  
50  
51  
52  
53  
54  
55  
56  
57  
58  
59  
60

The remaining measurements will then be used to validate the model's outputs. Following validation,  
the model can be used for ongoing policy and urban planning scenario testing exercises for emissions  
reduction policies in Accra, and other SSA cities with similar source profiles.

## 57 ETHICS AND DISSEMINATION

1  
2 This environmental study was deemed exempt from full ethics review at Imperial College London  
3  
4 and the University of Massachusetts Amherst; it was approved by the University of Ghana Ethics  
5  
6 Committee. While pollution sources (cars, roadside cookstoves and loud speakers, etc.) are the targets  
7  
8 of our field cameras and audio recorders, bystanders in public places and their voices may sometimes  
9  
10 be in the mix. Monitors are placed at a height (~ 4 meters and above) where faces are normally not  
11  
12 recognizable in the images and conversations unintelligible in the audio. Further, the audio recorders  
13  
14 record for only 10 seconds every 10 minutes and an image is taken once every five minutes. Extra  
15  
16 precautions (e.g. blurring of faces in imagery) is taken to maintain privacy of bystanders.  
17  
18  
19  
20  
21

22 Both public and private stakeholders and relevant civil society groups will be invited to annual  
23  
24 research consortium meetings where preliminary and final results will be shared. This will enable  
25  
26 policymakers to frame and understand impacts of current and future policy scenarios. Additionally,  
27  
28 results will be presented at international conferences and also published in peer-reviewed journals.  
29  
30 Further, we will also engage with civil society through blog posts and other social media platforms.  
31  
32  
33  
34  
35

## 36 **ACKNOWLEDGMENTS**

37  
38  
39  
40

41 We thank John Phillip Pearce for his role in the design and development of the integrated pollution  
42  
43 monitoring equipment box. Thank you to the staff of the Physics Department at the University of  
44  
45 Ghana for their assistance in setting up the laboratory.  
46  
47  
48  
49  
50  
51  
52  
53  
54  
55  
56  
57  
58  
59  
60

## FIGURE LEGENDS

**Figure 1. The Greater Accra Metropolitan Area (GAMA) and locations of the fixed and rotating sites.** The road network data is from OpenStreetMap combined with data from Ghana Geological Survey Department and the background land cover shapefile is from the World Bank (2014). The inset shows background maps of Africa and Ghana (ESRI), along with the GAMA boundary from Ghana Statistical Service. **High-density residential** indicates neighborhoods with small, crowded, irregular buildings and narrow unidentifiable unpaved roads such as in shantytowns and slums. **Low-density residential** indicates neighborhoods with small regular planned buildings and indicate formal residential areas. **Commercial/ business/ industrial** indicates neighborhoods with large buildings that can be used for commercial, industrial, office, or warehouse purposes. **Other** indicates areas with large spaces of vegetation (e.g., dense forest), barren land (e.g., sand, soil), or water bodies.

**Figure 2. Timeline of measurement campaign.** Weekly measurements consist of continuous ( $PM_{2.5}$  air concentration, noise levels, meteorological conditions, audio, and imagery) and integrated ( $PM_{2.5}$  and  $NO_x$  concentration) samples. We chose weekly integrated samples for  $PM_{2.5}$  and  $NO_x$  for logistical reasons (cost and time) as well as lessons from a previous study that showed relatively high temporal correlation between daily measurements [9].

**Figure 3. Images of environmental monitoring equipment.**

**Figure 4. Smoothed time series of minute-by-minute  $PM_{2.5}$  from 15 co-located real-time Zefan monitors in Accra.** The levels were neither corrected for RH or against integrated filter-based data.

**Figure 5. Deployment of the pollution measurement equipment.**

**Figure 6. Illustration of how object detection models and street-level imagery can be combined from the Accra campaign data to identify potential correlates of air and noise pollution.** Information recorded on the bottom of the images includes the date and time, camera name, and the ambient temperature.

## REFERENCES

- 1 UN. World Urbanization Prospects. 2018.  
<https://population.un.org/wup/Publications/Files/WUP2018-KeyFacts.pdf>
- 2 Lall SV, Henderson JV, Venables A. *Africa's cities: opening doors to the world*. Washington: : The World Bank 2017. doi:10.1596/978-1-4648-1044-2
- 3 Katoto PDMC, Byamungu L, Brand AS, *et al*. Ambient air pollution and health in Sub-Saharan Africa: Current evidence, perspectives and a call to action. *Environ Res* 2019;**173**:174–88. doi:10.1016/j.envres.2019.03.029
- 4 Petkova EP, Jack DW, Volavka-Close NH, *et al*. Particulate matter pollution in African cities. *Air Qual Atmos Heal* 2013;**6**:603–14. doi:10.1007/s11869-013-0199-6
- 5 World Health Organization. Ambient air pollution: a global assessment of exposure and burden of disease. 2016. <https://www.who.int/phe/publications/air-pollution-global-assessment/en/>
- 6 World Health Organization. Annual mean ambient PM2.5 (ug/m3) - from measurements, 2018 update. 2018.
- 7 Anenberg SC, Achakulwisut P, Brauer M, *et al*. Particulate matter-attributable mortality and relationships with carbon dioxide in 250 urban areas worldwide. *Sci Rep* 2019;**9**:1–6. doi:10.1038/s41598-019-48057-9
- 8 Dionisio K, Rooney MS, Arku RE, *et al*. Within-neighborhood patterns and sources of particle pollution: mobile monitoring and geographic information system analysis in four communities in Accra, Ghana. *Environ Health Perspect* 2010;**118**:607–13. doi:10.1289/ehp.0901365
- 9 Dionisio K, Arku RE, Hughes AF, *et al*. Air Pollution in Accra Neighborhoods: Spatial, Socioeconomic, and Temporal Patterns. *Environ Sci Technol* 2010;**44**:2270–6. doi:10.1021/es903276s
- 10 Rooney MS, Arku RE, Dionisio KL, *et al*. Spatial and temporal patterns of particulate matter sources and pollution in four communities in Accra, Ghana. *Sci Total Environ* 2012;**435–436**:107–14. doi:10.1016/j.scitotenv.2012.06.077
- 11 Sieber C, Ragettli MS, Brink M, *et al*. Land use regression modeling of outdoor noise exposure in informal settlements in Western Cape, South Africa. *Int J Environ Res Public Health* 2017;**14**. doi:10.3390/ijerph14101262
- 12 Essandoh PK, Armah FA. Determination of ambient noise Levels in the main commercial area of Cape Coast. *Res J Environ Earth Sci* 2011;**3**:637–44.
- 13 Baloye DO, Palamuleni LG. A comparative land use-based analysis of noise pollution levels in selected urban centers of Nigeria. *Int J Environ Res Public Health* 2015;**12**:12225–46. doi:10.3390/ijerph121012225
- 14 Ragettli MS, Goudreau S, Plante C, *et al*. Statistical modeling of the spatial variability of environmental noise levels in Montreal, Canada, using noise measurements and land use characteristics. *J Expo Sci Environ Epidemiol* 2016;**26**:597–605. doi:10.1038/jes.2015.82
- 15 Aguilera I, Foraster M, Basagaña X, *et al*. Application of land use regression modelling to assess the spatial distribution of road traffic noise in three European cities. *J Expo Sci Environ Epidemiol* 2015;**25**:97–105. doi:10.1038/jes.2014.61
- 16 Kheirbek I, Ito K, Neitzel R, *et al*. Spatial variation in environmental noise and air pollution in New York City. *J Urban Heal* 2014;**91**:415–31. doi:10.1007/s11524-013-9857-0
- 17 Perron S, Plante C, Ragettli MS, *et al*. Sleep disturbance from road traffic, railways, airplanes and from total environmental noise levels in montreal. *Int J Environ Res Public Health* 2016;**13**. doi:10.3390/ijerph13080809
- 18 Clark C, Paunovic K. WHO environmental noise guidelines for the european region: A systematic review on environmental noise and cognition. *Int J Environ Res Public Health* 2018;**15**. doi:10.3390/ijerph15020285
- 19 Basner M, Babisch W, Davis A, *et al*. Auditory and non-auditory effects of noise on health.



- 1  
2 *Lancet* 2014;**383**:1325–32. doi:10.1016/S0140-6736(13)61613-X
- 3 20 Zakpala RN, Armah FA, Sackey BM, *et al.* Night-Time Decibel Hell: Mapping Noise  
4 Exposure Zones and Individual Annoyance Ratings in an Urban Environment in Ghana.  
5 *Scientifica (Cairo)* 2014;**2014**:1–11. doi:10.1155/2014/892105
- 6 21 Zhou Z, Dionisio KL, Verissimo TG, *et al.* Chemical characterization and source  
7 apportionment of household fine particulate matter in rural, peri-urban, and urban West  
8 Africa. *Environ Sci Technol* 2014;**48**:1343–51. doi:10.1021/es404185m
- 9 22 Breathelife. BreathLife: Accra, Ghana. 2016.<http://breathelife2030.org/breathelifecity/accra-ghana/> (accessed 12 Mar 2019).
- 10 23 Knott S, Gyamfi K. ‘If you complain they see you as evil’: Accra’s religious noise problem.  
11 *Guard*. 2019.<https://www.theguardian.com/cities/2019/mar/27/if-you-complain-they-see-you-as-evil-accras-religious-noise-problem> (accessed 17 May 2019).
- 12 24 Bediako-Akoto RDO. Noise Pollution: A country at Risk. Dly. Graph.  
13 2018;:1.<https://www.graphic.com.gh/features/opinion/noise-pollution-a-country-at-risk.html>
- 14 25 Kaledzi I. Ghana asks mosques to turn down the noise and use WhatsApp for call to prayer.  
15 2018.<https://www.dw.com/en/ghana-asks-mosques-to-turn-down-the-noise-and-use-whatsapp-for-call-to-prayer/a-43373007>
- 16 26 Ghana Meteorological Agency. Ghana Meteorological Agency.  
17 [http://www.meteo.gov.gh/website/index.php?option=com\\_content&view=article&id=87:regional-weather-greater-accra-region&catid=42:24-hour-forecast-for-ghana&Itemid=62](http://www.meteo.gov.gh/website/index.php?option=com_content&view=article&id=87:regional-weather-greater-accra-region&catid=42:24-hour-forecast-for-ghana&Itemid=62)  
18 (accessed 6 Jul 2019).
- 19 27 Arku RE, Vallarino J, Dionisio KL, *et al.* Characterizing air pollution in two low-income  
20 neighborhoods in Accra, Ghana. *Sci Total Environ* 2008;**402**:217–31.  
21 doi:10.1016/j.scitotenv.2008.04.042
- 22 28 Boadi KO, Kuitunen M. Environmental and health impacts of household solid waste  
23 handling and disposal practices in Third World Cities: The case of the Accra Metropolitan  
24 Area, Ghana. *J Environ Health* 2005;**68**:32–6.
- 25 29 Songsore J, McGranahan G. Environment, wealth and health: towards an analysis of intra-  
26 urban differentials within the Greater Accra Metropolitan Area, Ghana. *Environ Urban*  
27 1993;:10–30.
- 28 30 GSS. Ghana Population and Housing Census.  
29 2010.<http://www.statsghana.gov.gh/nada/index.php/catalog/51>
- 30 31 World Bank. 2014 Land Cover Classification Of Accra, Ghana. 2014.  
31 <https://datacatalog.worldbank.org/dataset/c-2014-land-cover-classification-accra-ghana>
- 32 32 Volckens J, Quinn C, Leith D, *et al.* Development and evaluation of an ultrasonic personal  
33 aerosol sampler. *Indoor Air* 2017;**27**:409–16. doi:10.1111/ina.12318
- 34 33 Arku RE, Birch A, Shupler M, *et al.* Characterizing exposure to household air pollution  
35 within the Prospective Urban Rural Epidemiology ( PURE ) study. *Environ Int*  
36 2018;**114**:307–17. doi:10.1016/j.envint.2018.02.033
- 37 34 Pillarisetti A, Carter E, Rajkumar S, *et al.* Measuring personal exposure to fine particulate  
38 matter (PM 2.5) among rural Honduran women: A field evaluation of the Ultrasonic Personal  
39 Aerosol Sampler (UPAS). *Environ Int* 2019;**123**:50–3. doi:10.1016/j.envint.2018.11.014
- 40 35 Bulot FMJ, Johnston SJ, Basford PJ, *et al.* Long-term field comparison of the performances  
41 of multiple low-cost particulate matter sensors in an urban area. *Sci Rep* 2019;:1–16.  
42 doi:10.5281/ZENODO.2531601
- 43 36 Malings C, Tanzer R, Hauryliuk A, *et al.* Fine particle mass monitoring with low-cost  
44 sensors: Corrections and long-term performance evaluation. *Aerosol Sci Technol* 2019;**0**:1–  
45 15. doi:10.1080/02786826.2019.1623863
- 46 37 Sather M, Slonecker T, Mathew J, *et al.* Evaluation of ogawa passive sampling devices as an  
47 alternative measurement method for the nitrogen dioxide annual standard in El Paso, Texas.  
48 *Environ Monit Assess* 2007;**124**:211–21.
- 49 38 He B, Heal MR, Reis S. Land-use regression modelling of intra-urban air pollution variation

- 1  
2 in China: Current status and future needs. *Atmosphere (Basel)* 2018;**9**:1–19.  
3 doi:10.3390/atmos9040134
- 4 39 Rindleisch TC. A comparative evaluation of two sound level meters. 2018.  
5 doi:10.13140/RG.2.2.26395.31520
- 6 40 Hill AP, Prince P, Piña Covarrubias E, *et al.* AudioMoth: Evaluation of a smart open acoustic  
7 device for monitoring biodiversity and the environment. *Methods Ecol Evol* 2018;**9**:1199–  
8 211. doi:10.1111/2041-210X.12955
- 9 41 Fairbrass AJ, Firman M, Williams C, *et al.* CityNet—Deep learning tools for urban  
10 ecoacoustic assessment. *Methods Ecol. Evol.* 2018. doi:10.1111/2041-210X.13114
- 11 42 Xu M, Hong B, Jiang R, *et al.* Outdoor thermal comfort of shaded spaces in an urban park in  
12 the cold region of China. *Build Environ* 2019;**155**:408–20.  
13 doi:10.1016/j.buildenv.2019.03.049
- 14 43 Morguá J-A, Gacia E, Grossi C, *et al.* Atmospheric Carbon Dioxide variability at  
15 Aigüestortes, Central Pyrenees, Spain. *Reg Environ Chang* 2018;**19**:313–24.  
16 doi:10.1007/s10113-018-1443-2
- 17 44 Council of the European Union. Directive of The European Parliament and of The Council of  
18 25 June 2002 relating to the assessment and management of environmental noise. 2002.  
19 [https://publications.europa.eu/en/publication-detail/-/publication/27d1a64e-08f0-4665-a258-](https://publications.europa.eu/en/publication-detail/-/publication/27d1a64e-08f0-4665-a258-96f16c7af072/language-en)  
20 [96f16c7af072/language-en](https://publications.europa.eu/en/publication-detail/-/publication/27d1a64e-08f0-4665-a258-96f16c7af072/language-en)
- 21 45 Ogawa. NO, NO<sub>2</sub>, NO<sub>x</sub> and SO<sub>2</sub> sampling protocol using the Ogawa sampler. 2006.  
22 [http://ogawausa.com/wp-content/uploads/2017/11/prono-noxno2so206\\_206\\_1117.pdf](http://ogawausa.com/wp-content/uploads/2017/11/prono-noxno2so206_206_1117.pdf)
- 23 46 Larkin A, Geddes JA, Martin R V., *et al.* Global land use regression model for nitrogen  
24 dioxide air pollution. *Environ Sci Technol* 2017;**51**:6957–64. doi:10.1021/acs.est.7b01148
- 25 47 Barrington-Leigh C, Millard-Ball A. The world's user-generated road map is more than 80%  
26 complete. *PLoS One* 2017;**12**:e0180698. doi:10.1371/journal.pone.0180698
- 27 48 Hoek G, Beelen R, de Hoogh K, *et al.* A review of land-use regression models to assess  
28 spatial variation of outdoor air pollution. *Atmos Environ* 2008;**42**:7561–78.  
29 doi:10.1016/j.atmosenv.2008.05.057
- 30 49 Khan J, Ketznel M, Kakosimos K, *et al.* Road traffic air and noise pollution exposure  
31 assessment – A review of tools and techniques. *Sci Total Environ* 2018;**634**:661–76.  
32 doi:10.1016/j.scitotenv.2018.03.374
- 33 50 Lee M, Brauer M, Wong P, *et al.* Land use regression modelling of air pollution in high  
34 density high rise cities: A case study in Hong Kong. *Sci Total Environ* 2017;**592**.  
35 doi:10.1016/j.scitotenv.2017.03.094
- 36 51 Saraswat A, Apte JS, Kandlikar M, *et al.* Spatiotemporal land use regression models of fine,  
37 ultrafine, and black carbon particulate matter in New Delhi, India. *Environ Sci Technol*  
38 2013;**47**. doi:10.1021/es401489h
- 39 52 Weichenthal S, Hatzopoulou M, Brauer M. A picture tells a thousand...exposures:  
40 Opportunities and challenges of deep learning image analyses in exposure science and  
41 environmental epidemiology. *Environ Int* Published Online First: 2018.  
42 doi:10.1016/j.envint.2018.11.042
- 43 53 Redmon J, Divvala S, Girshick R, *et al.* You Only Look Once: Unified, Real-Time Object  
44 Detection. *Proc 2016 IEEE Conf Comput Vis Pattern Recognit (CVPR 2016)* 2015;:779–88.  
45 doi:10.1109/CVPR.2016.91
- 46 54 Lin TY, Maire M, Belongie S, *et al.* Microsoft COCO: Common objects in context. *Lect*  
47 *Notes Comput Sci (including Subser Lect Notes Artif Intell Lect Notes Bioinformatics)*  
48 2014;**8693 LNCS**:740–55. doi:10.1007/978-3-319-10602-1\_48
- 49 55 Liu W, Anguelov D, Erhan D, *et al.* SSD: Single shot multibox detector. *Lect Notes Comput*  
50 *Sci (including Subser Lect Notes Artif Intell Lect Notes Bioinformatics)* 2016;**9905**  
51 **LNCS**:21–37. doi:10.1007/978-3-319-46448-0\_2
- 52 56 Kuznetsova A, Rom H, Alldrin N, *et al.* The Open Images Dataset V4: Unified image  
53 classification, object detection, and visual relationship detection at scale. 2018;:1–

20.<http://arxiv.org/abs/1811.00982>

57 Salamon J, Bello JP. Deep Convolutional Neural Networks and Data Augmentation for  
Environmental Sound Classification. *IEEE Signal Process Lett* Published Online First: 2017.  
doi:10.1109/LSP.2017.2657381

58 Skamarock WC, Klemp JB. A time-split nonhydrostatic atmospheric model for weather  
research and forecasting applications. *J Comput Phys* 2008;**227**:3465–85.

59 Byun DW, Schere KL. Review of the governing equations, computational algorithms, and  
other components of the models-3 Community Multiscale Air Quality (CMAQ) modeling  
system. *Appl Mech Rev* 2006;**59**:51–77. doi:Doi 10.1115/1.2128636

60 Heist D, Isakov V, Perry S, *et al*. Estimating near-road pollutant dispersion: A model inter-  
comparison. *Transp Res Part D Transp Environ* 2013;**25**:93–105.  
doi:10.1016/j.trd.2013.09.003

### Author contributions

All the authors contributed to this work and have taken part in the academic discussion for writing the study protocol, drafting the article and revising it. SNC, ASA, MB, ME, JB, MT, AH, JM, ST, JN, JV, SA, EA, BB, RA gave substantial contributions to conception and design and acquisition of data. SNC, ASA, MB, ME, MT, RN, EM, JW, AB, FK, RA gave substantial contributions to the analysis plan for data; SNC, ASA, MB, ME, JB, RA draft and revised the manuscript; and all authors reviewed the final version.

### Funding

This work is supported by the Pathways to Equitable Healthy Cities grant from the Wellcome Trust [209376/Z/17/Z]. SC is supported by a Canadian Institutes for Health Research (CIHR) PhD scholarship as well as an Imperial College President's PhD scholarship. The content of this manuscript is solely the responsibility of the authors and does not necessarily represent the official views of the funders.

### Ethics Approval

The study environmental was exempt from seeking ethics approval at Imperial College London and the University of Massachusetts-Amherst and was given ethical approval at the University of Ghana (ECH 149/ 18-19).

### Competing interests

None

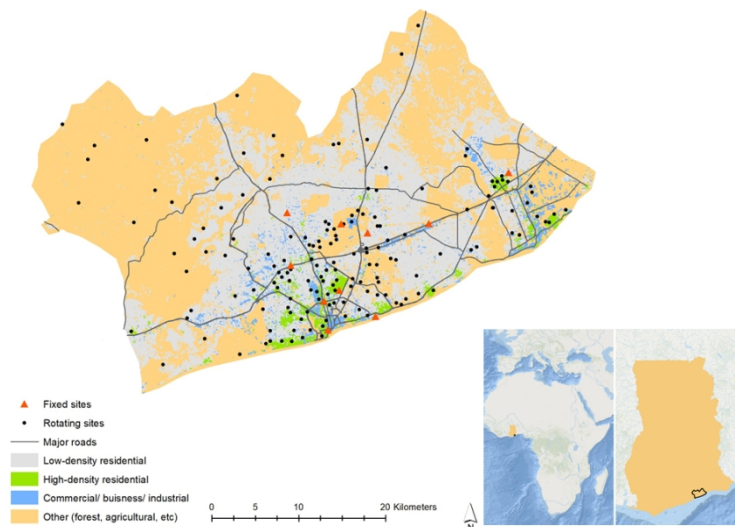

Figure 1. The Greater Accra Metropolitan Area (GAMA) and locations of the fixed and rotating sites. The road network data is from OpenStreetMap combined with data from Ghana Geological Survey Department and the background land cover shapefile is from the World Bank (2014). The inset shows background maps of Africa and Ghana (ESRI), along with the GAMA boundary from Ghana Statistical Service. High-density residential indicates neighborhoods with small, crowded, irregular buildings and narrow unidentifiable unpaved roads such as in shantytowns and slums. Low-density residential indicates neighborhoods with small regular planned buildings and indicate formal residential areas. Commercial/ business/ industrial indicates neighborhoods with large buildings that can be used for commercial, industrial, office, or warehouse purposes. Other indicates areas with large spaces of vegetation (e.g., dense forest), barren land (e.g., sand, soil), or water bodies.

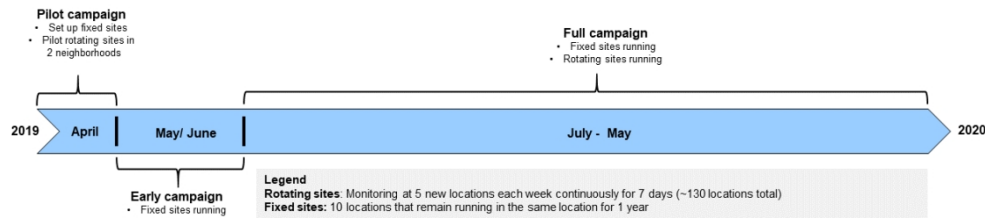

Figure 2. Timeline of measurement campaign. Weekly measurements consist of continuous (PM2.5 air concentration, noise levels, meteorological conditions, audio, and imagery) and integrated (PM2.5 and NOx concentration) samples. We chose weekly integrated samples for PM2.5 and NOx for logistical reasons (cost and time) as well as lessons from a previous study that showed relatively high temporal correlation between daily measurements.

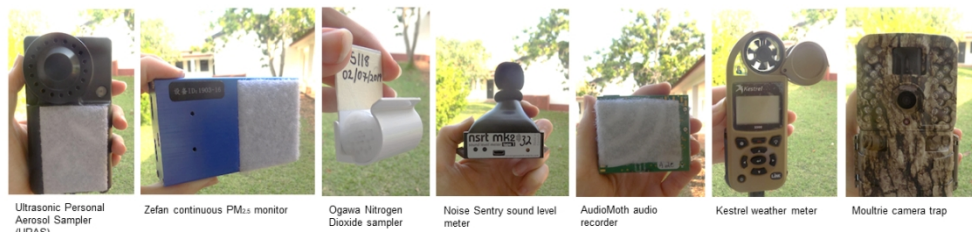

Figure 3. Images of environmental monitoring equipment.

1  
2  
3  
4  
5  
6  
7  
8  
9  
10  
11  
12  
13  
14  
15  
16  
17  
18  
19  
20  
21  
22  
23  
24  
25  
26  
27  
28  
29  
30  
31  
32  
33  
34  
35  
36  
37  
38  
39  
40  
41  
42  
43  
44  
45  
46  
47  
48  
49  
50  
51  
52  
53  
54  
55  
56  
57  
58  
59  
60

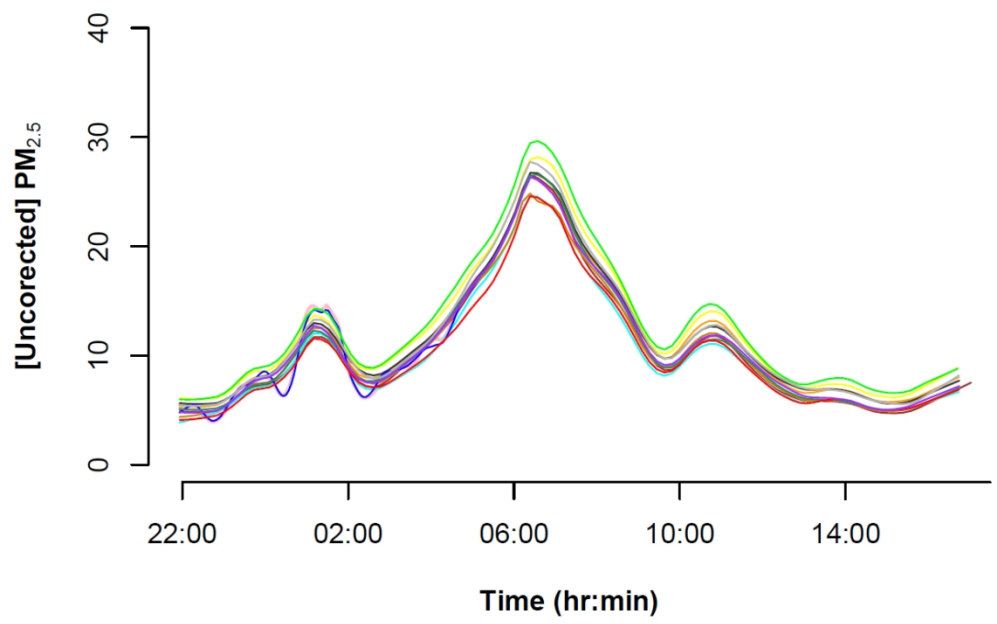

Figure 4. Smoothed time series of minute-by-minute PM<sub>2.5</sub> from 15 co-located real-time Zefan monitors in Accra. The levels were neither corrected for RH or against integrated filter-based data.

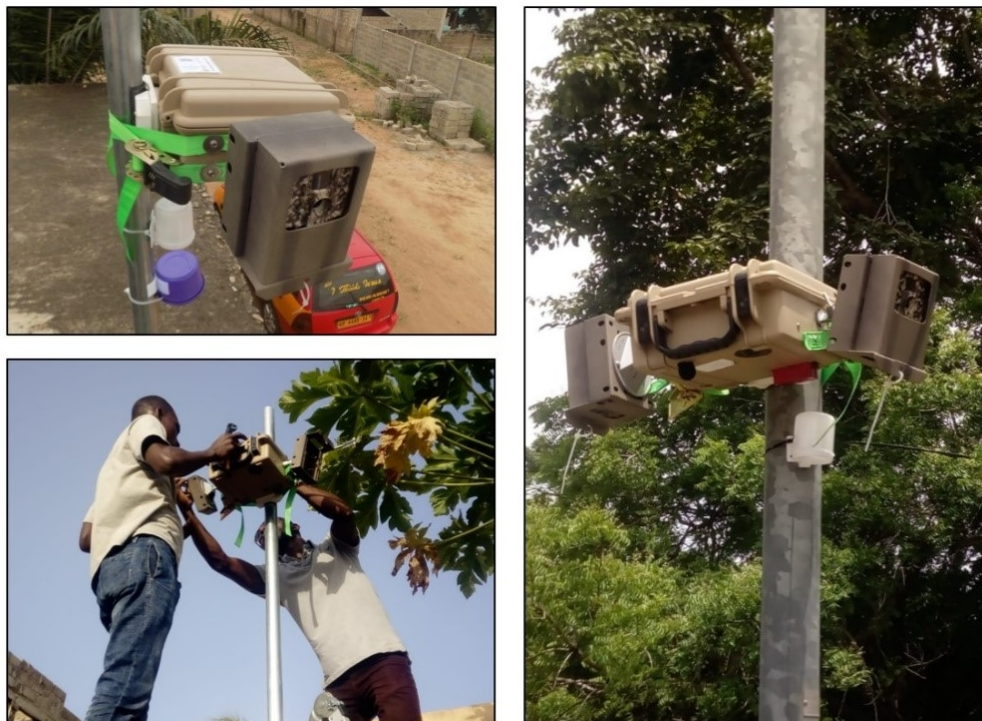

Figure 5. Deployment of the pollution measurement equipment.

265x195mm (96 x 96 DPI)



1  
2  
3  
4  
5  
6  
7  
8  
9  
10  
11  
12  
13  
14  
15  
16  
17  
18  
19  
20  
21  
22  
23  
24  
25  
26  
27  
28  
29  
30  
31  
32  
33  
34  
35  
36  
37  
38  
39  
40  
41  
42  
43  
44  
45  
46  
47  
48  
49  
50  
51  
52  
53  
54  
55  
56  
57  
58  
59  
60

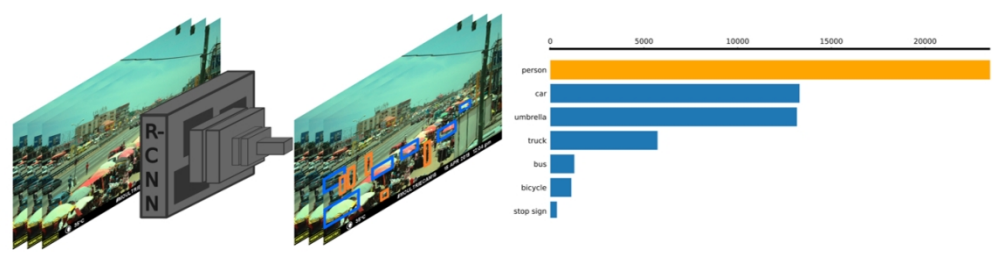

Figure 6. Illustration of how object detection models and street-level imagery can be combined from the Accra campaign data to identify potential correlates of air and noise pollution. Information recorded on the bottom of the images includes the date and time, camera name, and the ambient temperature.

# BMJ Open

## High-resolution spatiotemporal measurement of air and environmental noise pollution in sub-Saharan African cities: Pathways to Equitable Health Cities Study protocol for Accra, Ghana

|                                 |                                                                                                                                                                                                                                                                                                                                                                                                                                                                                                                                                                                                                                                                                                                                                                                                                                                                                                                                                                                                                                                                                                                                                                                                                                                                                                                                                                                                                                                                                                                                                                                                                                                                                                                                                                                                                                                                                                                                                                                                                                                                                                    |
|---------------------------------|----------------------------------------------------------------------------------------------------------------------------------------------------------------------------------------------------------------------------------------------------------------------------------------------------------------------------------------------------------------------------------------------------------------------------------------------------------------------------------------------------------------------------------------------------------------------------------------------------------------------------------------------------------------------------------------------------------------------------------------------------------------------------------------------------------------------------------------------------------------------------------------------------------------------------------------------------------------------------------------------------------------------------------------------------------------------------------------------------------------------------------------------------------------------------------------------------------------------------------------------------------------------------------------------------------------------------------------------------------------------------------------------------------------------------------------------------------------------------------------------------------------------------------------------------------------------------------------------------------------------------------------------------------------------------------------------------------------------------------------------------------------------------------------------------------------------------------------------------------------------------------------------------------------------------------------------------------------------------------------------------------------------------------------------------------------------------------------------------|
| Journal:                        | <i>BMJ Open</i>                                                                                                                                                                                                                                                                                                                                                                                                                                                                                                                                                                                                                                                                                                                                                                                                                                                                                                                                                                                                                                                                                                                                                                                                                                                                                                                                                                                                                                                                                                                                                                                                                                                                                                                                                                                                                                                                                                                                                                                                                                                                                    |
| Manuscript ID                   | bmjopen-2019-035798.R1                                                                                                                                                                                                                                                                                                                                                                                                                                                                                                                                                                                                                                                                                                                                                                                                                                                                                                                                                                                                                                                                                                                                                                                                                                                                                                                                                                                                                                                                                                                                                                                                                                                                                                                                                                                                                                                                                                                                                                                                                                                                             |
| Article Type:                   | Protocol                                                                                                                                                                                                                                                                                                                                                                                                                                                                                                                                                                                                                                                                                                                                                                                                                                                                                                                                                                                                                                                                                                                                                                                                                                                                                                                                                                                                                                                                                                                                                                                                                                                                                                                                                                                                                                                                                                                                                                                                                                                                                           |
| Date Submitted by the Author:   | 06-Apr-2020                                                                                                                                                                                                                                                                                                                                                                                                                                                                                                                                                                                                                                                                                                                                                                                                                                                                                                                                                                                                                                                                                                                                                                                                                                                                                                                                                                                                                                                                                                                                                                                                                                                                                                                                                                                                                                                                                                                                                                                                                                                                                        |
| Complete List of Authors:       | <p>Clark, Sierra; Imperial College London, School of Public Health<br/> Alli, Abosedo; University of Massachusetts Amherst, Department of Environmental Health Sciences<br/> Brauer, Michael; The University of British Columbia, School of Population and Public Health<br/> Ezzati, Majid; Imperial College London, School of Public Health; Imperial College London, MRC-PHE Center for Environment and Health<br/> Baumgartner, Jill ; McGill University, Institute for Health and Social Policy; McGill University, Department of Epidemiology, Biostatistics, and Occupational Health<br/> Toledano, Mireille; Imperial College London, School of Public Health; Imperial College London, MRC-PHE Center for Environment and Health<br/> Hughes, Allison; University of Ghana, Department of Physics<br/> Nimo, James; University of Ghana, Department of Physics<br/> Moses, Josephine; University of Ghana, Department of Physics<br/> Terkpertey, Solomon; University of Ghana, Department of Physics<br/> Vallarino, Jose; Harvard University, T.H. Chan School of Public Health<br/> Agyei-Mensah, Samuel; University of Ghana, Department of Geography and Resource Development<br/> Agyemang, Ernest; University of Ghana, Department of Geography and Resource Development<br/> Nathvani, Ricky; Imperial College London, School of Public Health<br/> Muller, Emily; Imperial College London, School of Public Health<br/> Bennett, James; Imperial College London, School of Public Health<br/> Wang, Jiayuan; University of Massachusetts Amherst, Department of Environmental Health Sciences<br/> Beddows, Andrew; King's College London, Department of Analytical, Environmental and Forensic Sciences<br/> Kelly, Frank; King's College London, Department of Analytical, Environmental and Forensic Sciences<br/> Barratt, Benjamin; King's College London, Department of Analytical, Environmental and Forensic Sciences<br/> Beevers, Sean; King's College London<br/> Arku, Raphael; University of Massachusetts Amherst, Department of Environmental Health Sciences</p> |
| <b>Primary Subject Heading</b>: | Research methods                                                                                                                                                                                                                                                                                                                                                                                                                                                                                                                                                                                                                                                                                                                                                                                                                                                                                                                                                                                                                                                                                                                                                                                                                                                                                                                                                                                                                                                                                                                                                                                                                                                                                                                                                                                                                                                                                                                                                                                                                                                                                   |

1  
2  
3  
4  
5  
6  
7  
8  
9  
10  
11  
12  
13  
14  
15  
16  
17  
18  
19  
20  
21  
22  
23  
24  
25  
26  
27  
28  
29  
30  
31  
32  
33  
34  
35  
36  
37  
38  
39  
40  
41  
42  
43  
44  
45  
46  
47  
48  
49  
50  
51  
52  
53  
54  
55  
56  
57  
58  
59  
60

|                            |                                                            |
|----------------------------|------------------------------------------------------------|
| Secondary Subject Heading: | Global health                                              |
| Keywords:                  | STATISTICS & RESEARCH METHODS, EPIDEMIOLOGY, PUBLIC HEALTH |
|                            |                                                            |

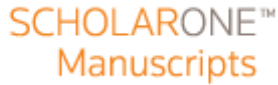



I, the Submitting Author has the right to grant and does grant on behalf of all authors of the Work (as defined in the below author licence), an exclusive licence and/or a non-exclusive licence for contributions from authors who are: i) UK Crown employees; ii) where BMJ has agreed a CC-BY licence shall apply, and/or iii) in accordance with the terms applicable for US Federal Government officers or employees acting as part of their official duties; on a worldwide, perpetual, irrevocable, royalty-free basis to BMJ Publishing Group Ltd ("BMJ") its licensees and where the relevant Journal is co-owned by BMJ to the co-owners of the Journal, to publish the Work in this journal and any other BMJ products and to exploit all rights, as set out in our [licence](#).

The Submitting Author accepts and understands that any supply made under these terms is made by BMJ to the Submitting Author unless you are acting as an employee on behalf of your employer or a postgraduate student of an affiliated institution which is paying any applicable article publishing charge ("APC") for Open Access articles. Where the Submitting Author wishes to make the Work available on an Open Access basis (and intends to pay the relevant APC), the terms of reuse of such Open Access shall be governed by a Creative Commons licence – details of these licences and which [Creative Commons](#) licence will apply to this Work are set out in our licence referred to above.

Other than as permitted in any relevant BMJ Author's Self Archiving Policies, I confirm this Work has not been accepted for publication elsewhere, is not being considered for publication elsewhere and does not duplicate material already published. I confirm all authors consent to publication of this Work and authorise the granting of this licence.

1  
2 **High-resolution spatiotemporal measurement of air and environmental noise pollution in sub-**  
3 **Saharan African cities: Pathways to Equitable Health Cities Study protocol for Accra, Ghana**  
4

5 Sierra N Clark <sup>a</sup>, Abosede S Alli <sup>b</sup>, Michael Brauer <sup>c</sup>, Majid Ezzati <sup>a,d,e,f</sup>, Jill Baumgartner <sup>g,h</sup>, Mireille  
6 Toledano <sup>a,d</sup>, Allison Hughes <sup>i</sup>, James Nimo <sup>i</sup>, Josephine Moses <sup>i</sup>, Solomon Terkper <sup>i</sup>, Jose Vallarino  
7 <sup>j</sup>, Samuel Agyei-Mensah <sup>k</sup>, Ernest Agyemang <sup>k</sup>, Ricky Nathvani <sup>a</sup>, Emily Muller <sup>a</sup>, James Bennett <sup>a,d</sup>,  
8 Jiayuan Wang <sup>b</sup>, Andrew Beddows <sup>d,l</sup>, Frank Kelly <sup>d,l</sup>, Benjamin Barratt <sup>d,l</sup>, Sean Beavers <sup>d,l</sup>, Raphael  
9 E Arku <sup>b,\*</sup>  
10  
11

12 <sup>a</sup> Department of Epidemiology and Biostatistics, School of Public Health, Imperial College London,  
13 London, UK

14 <sup>b</sup> Department of Environmental Health Sciences, School of Public Health and Health Sciences,  
15 University of Massachusetts, Amherst, USA

16 <sup>c</sup> School of Population and Public Health, The University of British Columbia, Vancouver, Canada

17 <sup>d</sup> MRC Center for Environment and Health, Imperial College London, London, UK

18 <sup>e</sup> Abdul Latif Jameel Institute for Disease and Emergency Analytics, Imperial College London,  
19 London, UK

20 <sup>f</sup> Regional Institute for Population Studies, University of Ghana, Legon, Ghana

21 <sup>g</sup> Institute for Health and Social Policy, McGill University, Montreal, Canada

22 <sup>h</sup> Department of Epidemiology, Biostatistics, and Occupational Health, McGill University, Montreal,  
23 Canada

24 <sup>i</sup> Department of Physics, University of Ghana, Legon, Ghana

25 <sup>j</sup> Harvard T.H. Chan School of Public Health, Boston, MA, USA

26 <sup>k</sup> Department of Geography and Resource Development, University of Ghana, Legon, Ghana

27 <sup>l</sup> Department of Analytical, Environmental and Forensic Sciences, King's College London, London,  
28 UK  
29  
30  
31

32  
33 **\*Corresponding author:**

34 Raphael E Arku

35 School of Public Health and Health Sciences

36 University of Massachusetts

37 Amherst, MA, USA

38 E-mail: rarku@umass.edu  
39  
40

41 **Word count:** 4625  
42  
43  
44  
45  
46  
47  
48  
49  
50  
51  
52  
53  
54  
55  
56  
57  
58  
59  
60

## ABSTRACT

**Introduction:** Air and noise pollution are emerging environmental health hazards in African cities, with potentially complex spatial and temporal patterns. Limited local data is a barrier to the formulation and evaluation of policies to reduce air and noise pollution.

**Methods and analysis:** We designed a year-long measurement campaign to characterize air and noise pollution and their sources at high-resolution within the Greater Accra Metropolitan Area, Ghana. Our design utilizes a combination of fixed (year-long,  $n = 10$ ) and rotating (week-long,  $n = \sim 130$ ) sites, selected to represent a range of land uses and source influences (e.g. background, road-traffic, commercial, industrial, and residential areas, and various neighbourhood socioeconomic classes). We will collect data on fine particulate matter ( $PM_{2.5}$ ), nitrogen oxides ( $NO_x$ ), weather variables, sound (noise level and audio) along with street-level time-lapse images. We deploy low-cost, low-power, lightweight monitoring devices that are robust, socially unobtrusive, and able to function in the Sub-Saharan African (SSA) climate. We will use state-of-the-art methods, including spatial statistics, deep/machine learning, and processed-based emissions modelling, to capture highly resolved temporal and spatial variations in pollution levels across Accra and to identify their potential sources. This protocol can serve as a prototype for other SSA cities.

**Ethics and dissemination:** This environmental study was deemed exempt from full ethics review at Imperial College London and the University of Massachusetts Amherst; it was approved by the University of Ghana Ethics Committee. This protocol is designed to be implementable in SSA cities to map environmental pollution to inform urban planning decisions to reduce health harming exposures to air and noise pollution. It will be disseminated through local stakeholder engagement (public and private sectors), peer-reviewed publications, contribution to policy documents, media, and conference presentations.

1  
2  
3  
4  
5  
6  
7  
8  
9  
10  
11  
12  
13  
14  
15  
16  
17  
18  
19  
20  
21  
22  
23  
24  
25  
26  
27  
28  
29  
30  
31  
32  
33  
34  
35  
36  
37  
38  
39  
40  
41  
42  
43  
44  
45  
46  
47  
48  
49  
50  
51  
52  
53  
54  
55  
56  
57  
58  
59  
60

**Key words:** Air pollution, noise pollution, sound classification, environmental monitoring, environmental modelling, machine learning, convolution neural network, urban health, health inequality, sub-Saharan Africa

For peer review only

## STRENGTHS AND LIMITATIONS OF THE STUDY

- Our study is the largest air and noise pollution measurement campaign conducted in a major SSA city and serves as a prototype for other cities in SSA.
- The study relies on new sensor technologies to generate rich datasets on air and noise pollution along with imagery and audio recordings that help identify sources across ~ 140 locations.
- Data from a combination of fixed (1 year) and rotating (7 day) monitoring sites representing a diversity of areas will allow for an assessment of both the temporal and spatial variability of pollution.
- While our study makes use of next-generation low-cost technologies, significant need for human resources is required for site identification and preparation, equipment deployment and maintenance, and data download and management.



## INTRODUCTION

Sub-Saharan Africa (SSA) is the world's fastest urbanising region, with the number of urban dwellers having increased by over 400% from 84 million in 1980 to an estimated urban population of ~450 million people in 2020 [1]. Urban growth in SSA has been largely unplanned especially in relation to housing, transport and energy. As a result, air and noise pollution are increasingly a public health concern for SSA urban residents [2–4]. For example, estimates from global models suggest that ambient fine particulate matter (Particulate Matter with diameter <2.5 micrometres (PM<sub>2.5</sub>)) in SSA is well above levels in high-income North America and Western Europe [3,5]. The data from the few available measurement studies show that only about 10% of cities in SSA are meeting the World Health Organization (WHO) annual average Air Quality Guideline of 10 µg/m<sup>3</sup> [5,6]. While such global estimates and the limited measurement data provide a broad view of air pollution, they do not capture the spatial variability and within-city disparities, nor do they provide information on sources [7–9]. Those within-city differences are important determinants of pollution related health inequalities. There are even less data on noise pollution, and none on its health burden, and the limited data show much higher levels compared to cities in high-income countries [10–15], which may be associated with hearing loss, sleep disturbance, impaired cognitive function, and cardiovascular disease [16–18].

Air and noise pollution in SSA have a complex mix of local and regional sources: these include informal industries; transportation predominantly from old imported vehicles for commercial and private use; biomass use for household and commercial activities; household trash burning; re-suspended dust from unpaved roads; dust from regional dust storms; and noise from road-traffic, small road-side businesses, and religious practices, to name a few [4,7,9,19,20]. These sources influence the pollutant mixture (e.g. PM, Nitrogen Oxide (NO) and Nitrogen Dioxide (NO<sub>2</sub>)) and the type of urban sounds, resulting in variation in spatial patterns and potentially differential impacts on health. Carefully designed measurements using low-cost robust sensors present an opportunity to

1  
2 provide data on air and noise pollution levels, variations, and sources, to inform and evaluate the  
3 effectiveness of policies in SSA.  
4

5  
6 Motivated in part by earlier air pollution data from four neighbourhoods in the city core, Accra,  
7  
8 Ghana's largest city, in 2018 announced initiatives to reduce air pollution [21]; whereas noise is  
9 currently making headlines in both local and international media [22–24]. Our goal is to leverage  
10 advancement in sensor technology, modelling and image processing to design a measurement  
11 campaign combined with machine learning, statistical, and process-based modelling to characterize  
12 highly resolved space-time variability of air and noise pollution, and their sources in the Greater  
13 Accra Metropolitan Area (GAMA). This work is nested within the larger multi-country and multi-  
14 city “Pathways to Equitable Healthy Cities” study (<http://equitablehealthycities.org/>), which aims to  
15 identify and inform equitable and healthy urban development and revitalization pathways in six cities  
16 on four continents.  
17  
18

19  
20 This paper details the protocol being used to collect and analyse pollution data in high resolution and  
21 provides practical guideline in a rapidly growing SSA metropolitan area. As one of the few studies  
22 of air and noise pollution at fine spatial resolution in a SSA city, this paper and the data to be generated  
23 make three main contributions. First, to develop and implement a data-rich measurement campaign  
24 on air and noise pollution in the GAMA that can provide spatially and temporally graded data.  
25  
26 Second, to present a measurement protocol that can be readily adapted to other SSA cities. Third, to  
27 describe how the data will be utilized to fit and/or validate geostatistical, machine learning, and  
28 physical dispersion models that can predict pollution levels at high-spatial and temporal resolution  
29 and simulate and evaluate different policy scenarios on air quality in Accra.  
30  
31  
32  
33  
34  
35  
36  
37  
38  
39  
40  
41  
42  
43  
44  
45  
46  
47  
48  
49  
50  
51  
52  
53  
54  
55  
56  
57  
58  
59  
60

## METHODS AND ANALYSIS

### Study location and timeline

Our measurement campaign is focussed on the GAMA, which covers about 1500 km<sup>2</sup>, and consists of multiple metropolis and municipalities, with Accra Metropolitan Area (AMA) at its core (Figure 1). Accra lies in the dry equatorial climate zone with rainy (May-September) and dry Harmattan seasons characterized by dusty north-easterly trade winds from the Sahara Desert. The elevation of the GAMA is near sea level. Monthly average temperatures range from 27 to 32° C with average daily humidity of 79% [25]. As Ghana's capital and largest city, Accra has become one of SSA's hubs for business, technology, communications, and education. However, there remain large inequalities in housing and possibly exposure to environmental health risks [8,26–28].

We scheduled a one-year field measurement campaign to cover the rainy and Harmattan periods. Measurements began with a 3-week long pilot campaign in April 2019 and will continue until May 2020 (Figure 2).

### Measurement campaign design

To capture the temporal (daily, weekly, seasonal) and spatial variations in both pollution and its sources across the entire study area, we are using a combination of 'fixed' and 'rotating' monitoring sites. The sites represent a blend of features such as background areas (e.g., low traffic and high green space), low vs. high road-traffic, sparsely vs. densely built-up areas, poor vs. affluent, and established vs. emerging neighbourhoods.

Ten fixed sites have been installed and will operate continuously all year long; the sites were purposefully selected based on the above criteria related to population density, road-traffic and road-networks, and on neighbourhood socio-economic status and biomass fuel use based on national

1  
2 census data [29]. The sites included three locations used in an earlier air pollution study [7,26] in the  
3  
4 Accra Metropolitan Area and additional provisions have been made to co-locate with World Bank  
5  
6 sponsored regulatory monitoring sites and one at the U.S. Embassy.  
7

8  
9 To capture spatial patterns of pollution while maximizing a finite number of sensor packages, we also  
10  
11 operate sites that rotate weekly in order to capture the spatial variation in pollution levels and sources  
12  
13 as well as the temporal variation within and between days. In each measurement week, measurements  
14  
15 are collected at four to five new locations that continuously monitor for seven days. By the end of the  
16  
17 study ~130 unique locations will have been monitored for one week across the GAMA.  
18  
19

20 In selecting the rotating site locations, we used a stratified random sampling approach:  
21

- 22  
23 1. The study area (GAMA) was stratified by a land use grid (20m x 20m raster converted into a  
24  
25 polygon shapefile) with four classes (medium/ low-density residential, high-density  
26  
27 residential, commercial, business, and industrial areas, and ‘other’ areas (e.g. parks, forest,  
28  
29 agricultural areas)) [30] and inside or outside the main Accra Metropolitan Area (AMA).  
30  
31
- 32  
33 2. The computer then generated and returned the latitude/ longitude coordinates of a random  
34  
35 sample of 130 target measurement site locations within strata.  
36  
37
- 38  
39 3. Target measurement locations were first examined by overlaying point locations onto Google  
40  
41 Maps and Google Earth to identify sites that were in restricted areas (e.g., military barracks).  
42  
43 Sites in restricted areas were re-sampled to a nearest suitable spot that also fell within the  
44  
45 same type of land use strata (n~5 sites).  
46  
47
- 48  
49 4. Using the coordinates of the target sampling locations, the field team then visit individual sites  
50  
51 throughout the campaign to find measurement sites at or as close as possible to the target  
52  
53 locations and also with the same land use characteristics.  
54  
55
- 56  
57 5. When a site is deemed structurally sound for the field team to install equipment at (e.g.,  
58  
59 staircase to the roof) and can allow for the equipment to be installed at a target height,  
60  
work are in sections below).

6. During the measurement campaign, we will actively review the balance between the number of actual measurement sites by land use strata as originally designed, and potentially sample additional sites to make up for unrepresentative site types.

## Measurement methods and equipment

We systematically selected and are employing low-cost, low-power, and lightweight monitors that are robust and able to function in an environment characterized by high temperatures and humidity, rain and dust storms, and with limited and intermittent electricity supply from the grid, and at the same time are socially unobtrusive (Table 1, Figure 3).

**Table 1. Features, dimensions, and prices of the monitors/ sensors**

| Monitor                                                | Cost per unit (USD \$) | Weight (g) | Dimensions (cm) | Battery/ power requirements  | Memory requirements              | Recording/ measurement interval | Measured parameters                                        |
|--------------------------------------------------------|------------------------|------------|-----------------|------------------------------|----------------------------------|---------------------------------|------------------------------------------------------------|
| *Ultrasonic Personal Aerosol Sampler (UPAS)            | 1200                   | 230        | 12.8x7.0x3.3    | Internal chargeable battery* | Micro SD                         | 7 days                          | PM <sub>2.5</sub> integrated (µg/m <sup>3</sup> )          |
| *ZeFan continuous PM <sub>2.5</sub> monitor            | 70                     | 150        | 10.6x6.3x2.6    | Internal chargeable battery* | Internal memory (USB connection) | 1 minute                        | PM <sub>2.5</sub> continuous (µg/m <sup>3</sup> )          |
| †Ogawa Nitrogen Dioxide (NO <sub>2</sub> /NOx) sampler | 85                     | 60         | 8.0x4.0x3.0     | NA                           | NA                               | 7 days                          | NO <sub>2</sub> (ppb) integrated; NOx (ppb) integrated     |
| Noise Sentry sound level meter                         | 306                    | 100        | 7.6x3.9 x5.9    | Internal chargeable battery  | Internal memory (USB connection) | 1 minute                        | Sound levels (dBA)                                         |
| AudioMoth audio recorder                               | 70                     | 95         | 6.2x5.0x2.2     | AA batteries                 | Micro SD                         | 10 seconds every 10 minutes     | Audio (.WAV file)                                          |
| Kestrel weather meter                                  | 310                    | 120        | 12.7x4.5x2.8    | AA batteries                 | Internal memory (USB connection) | 1 minute                        | Temperature; relative humidity; wind speed; wind direction |
| Moultrie camera trap                                   | 150                    | 500        | 13.1x8.1x6.6    | AA batteries                 | SD                               | 5 minutes                       | Time-lapse imagery (.jpeg file)                            |

dBA: A-weighted decibels; PM<sub>2.5</sub>: Particulate matter with aerodynamic diameter less than 2.5 micrometres; ppb: parts per billion

\*UPAS and Zefan battery life can be extended using an external power bank. We used the always-on battery pack from Voltaic Systems ([www.voltaicsystems.com](http://www.voltaicsystems.com)).

1 †NO<sub>2</sub>/ NO<sub>x</sub>: Nitrogen Dioxide/Oxides (price includes clip, screens, plastic re-sealable pouch and reusable airtight storage  
2 and shipping vial  
3  
4  
5  
6  
7

## 8 Air pollution monitors 9

10  
11  
12 *Integrated PM<sub>2.5</sub>*: The Ultrasonic Personal Aerosol Sampler (UPAS) [31] from Access Sensor  
13 Technologies (Fort Collins, USA) (UPAS) is a time-integrated PM<sub>2.5</sub> monitor and has a quiet solid-  
14 state miniature piezoelectric pump for drawing air through a customized cyclone onto a 37mm  
15 diameter filter media contained in barcoded cartridges within the device. With a mass flow sensor  
16 and controller, UPAS provides a steady flow rate over time. A mobile app makes UPAS easily  
17 programmable to collect samples at varying duty cycles. The UPAS devices are being operated at 1  
18 litre per minute (lpm) at 50% duty cycle to avoid overloading the weekly-integrated filters. The UPAS  
19 has been evaluated in laboratory and field settings against a federal reference monitor (URG - 2000  
20 - 30EGN - A; URG Corp., USA), personal environmental monitor (PEM 761 - 203; SKC, Inc.,  
21 USA) and Harvard Impactors, respectively and has proven valid for ambient, household, and personal  
22 monitoring in a typical tropical climate as our study [31–33].  
23  
24  
25  
26  
27  
28  
29  
30  
31  
32  
33  
34  
35  
36  
37

38 *Continuous PM<sub>2.5</sub>*: The ZeFan continuous monitor (<http://www.zfznkj.com/>) is a portable direct-  
39 reading PM<sub>2.5</sub> monitor that is based on light scattering technique [34]. ZeFan uses the Plantower  
40 sensor (model PMS7003) which has been validated against TEOM 1400a analyser and tested for  
41 durations ranging from 6 months to a year in various environmental conditions [34,35]. Prior to field  
42 deployment, we tested minute-by-minute monitor-monitor precision by running 15 monitors  
43 alongside each other over a 24-hour period at the University of Ghana, Legon campus with average  
44 relative humidity (RH) (~ 78%) and temperature (29 °C) representative of the city, and the  
45 measurements had good agreement (Figure 4). Since light-scattering techniques only infer PM mass  
46 from detecting particle number concentrations and are impacted by weather conditions (i.e. RH and  
47 temperature), their estimates of mass concentration are inexact. Thus, we will co-locate the ZeFan  
48  
49  
50  
51  
52  
53  
54  
55  
56  
57  
58  
59  
60

1  
2 with a U.S. federal equivalent continuous monitor Met One BAM 1020 at three sites, each with unique  
3  
4 source influence in Accra for a week at the end of the campaign and adjust the minute-by-minute PM  
5  
6 records for impact of RH and then their average against the co-located integrated PM<sub>2.5</sub> concentrations  
7  
8 from the UPAS.  
9

10  
11 *Nitrogen Oxides (NO<sub>x</sub>/NO<sub>2</sub>):* The Ogawa Passive Sampler (<https://ogawausa.com>) is being used to  
12  
13 measure NO<sub>x</sub> and NO<sub>2</sub>, which are inorganic gaseous indicators of traffic related air pollution [36].  
14  
15 The sampler is easy to deploy, reusable, and does not require electricity, thus making it a cost-  
16  
17 effective option in SSA settings. The sampler consists of two chambers with double sided diffusion  
18  
19 that can concurrently capture NO<sub>x</sub> and NO<sub>2</sub> concentrations on collection pads pre-coated with 2-  
20  
21 phenyl-4,4,5,5-tetramethylimidazoline-1-oxyl-3-oxide and triethanolamine, respectively. The  
22  
23 samplers are covered by an opaque plastic container which serves as weather shield.  
24  
25  
26  
27  
28  
29

### 30 Sound monitors

31  
32  
33  
34 *Sound levels:* The Type II Noise Sentry Sound Level Meter (SLM) datalogger (NSRT\_mk3) from  
35  
36 Convergence Instruments, Canada, is being used to measure sound levels at 1-minute integrating and  
37  
38 logging intervals. The Noise Sentry is a relatively low-cost SLM for capturing and constructing  
39  
40 common metrics of environmental noise pollution with multiple weighting curves (A, C, Z). It is  
41  
42 small and rugged, built to withstand temperatures in the range of -20°C to 60°C, and protected against  
43  
44 water and dust. Previous studies have used the Noise Sentry SLM in diverse settings [12,14]. Our  
45  
46 pre-pilot tests of monitor-monitor precision showed good agreement (more details in supplementary  
47  
48 information 1 (SI 1)). Our Type II Noise Sentry SLMs were also validated in a separate aircraft noise  
49  
50 study conducted in San Francisco against a Type I industry standard instrument (DUO 01dB) [37],  
51  
52 and the agreement was high (mean and median second by second difference between the instruments  
53  
54 was -0.42 and -0.38 dBA, respectively).  
55  
56  
57  
58  
59  
60

1  
2 *Audio:* The AudioMoth audio recorder is a low-cost, full spectrum, acoustic logger developed by  
3  
4 Open Acoustic Devices (Oxford, UK) [38]. The AudioMoth will complement the sound level meter  
5  
6 by recording audio which will be used to classify different types of sounds in an urban environment  
7  
8 (e.g., animal vs vehicle sounds). The AudioMoths are set to a sampling rate of 32 kHz in our study  
9  
10 to capture the majority of sound in the audible range [39].  
11  
12  
13  
14

#### 15 Weather monitors

16  
17  
18  
19  
20 The Kestrel 5500 weather meter (Nielsen-Kellerman Inc., Boothwyn, PA, USA) is being utilized to  
21  
22 record weather variables every minute. The Kestrel is a hand-held environmental meter and  
23  
24 considered tough and immune to the elements. It tracks several weather parameters, including  
25  
26 temperature, relative humidity, and heat index. It was selected for its low power consumption, large  
27  
28 memory capacity (>10,000 data points), and dust-and water-proof properties. Kestrel 5500 has been  
29  
30 used in several studies in diverse settings [40,41]. According to factory specifications, the accuracy  
31  
32 of the instrument is 0.5°C for temperature and 2% for relative humidity.  
33  
34  
35  
36  
37  
38

#### 39 Time-lapse cameras

40  
41  
42  
43 To characterize sources of pollution in space and time, we use weatherproof and rugged time-lapse  
44  
45 cameras (Moultrie-50 camera trap, PERDIX wildlife, UK). The cameras are programmed to capture  
46  
47 images at 5-minute intervals throughout the sampling period, including at night using infrared  
48  
49 technology. Depending on the location, one or two cameras are mounted to capture multiple frames  
50  
51 of view of potential pollution sources in the street such as cars and community cookstoves.  
52  
53  
54  
55  
56

#### 57 Integrated equipment monitoring box



1  
2 To house the equipment, we built integrated field measurement boxes using weather protective  
3  
4 Seahorse (SE-300) cases. The cases were designed and weather tested to securely house each piece  
5  
6 of equipment along with battery packs inside a single compartment, and could be mounted on poles  
7  
8 of different sizes using ratchet straps. The cameras are mounted on the outside of the box with  
9  
10 rotational multi-access brackets for ease of orientation. Additionally, soundproof foam was placed  
11  
12 in-between the air monitors and the SLM to mitigate internal sound that might be generated from the  
13  
14 quiet air pollution monitor pumps. NO<sub>x</sub>/NO<sub>2</sub> passive samplers and the audio recorders are placed  
15  
16 outside of the measurement boxes in their own smaller weather protective plastic cases.  
17  
18  
19  
20  
21

## 22 **Equipment deployment and data capture**

23  
24  
25  
26  
27 The field team identifies potential sites at or as near as possible to the computer-generated locations  
28  
29 using direction from the saved locations on Google Maps. The team then approaches residents,  
30  
31 owners, or managers, and explains the study rationale and seeks approval to install equipment for a 1-  
32  
33 year (fixed sites) or 7-day (rotating sites) period. The team carry signed letters containing description  
34  
35 of the research and contact information of project investigators at the University of Ghana. The site  
36  
37 is then prepared, and the equipment box is mounted on metal poles, in care of an established contact  
38  
39 person, and out of direct reach of passers-by. Depending on the specific site, the poles are secured on  
40  
41 flat rooftops/ balconies of one-story buildings or directly in the ground (Figure 5) about 4 meters high  
42  
43 ( $\pm 1$  m), as is a common practice in ambient air pollution and noise measurement [42], and also has no  
44  
45 obstruction between the monitors and the sources of air and noise pollution. The cameras are mounted  
46  
47 on the outside of the box and secured in metal cases.  
48  
49  
50  
51

52 After deployment, the field team completes a short form, documenting information about the site,  
53  
54 including the presence or absence of visible pollution sources (e.g., road-side cooking), mitigation  
55  
56 factors (e.g., trees) or other locations/ features of interest, such as road-side food sales, shopping  
57  
58 centres, schools, or hospitals, etc. For the rotating sites, four to five locations are monitored each  
59  
60

1  
2 week. Because of logistical and time constraints related to setting up each site, the team chooses sites  
3  
4 that are within the same part of the city, but may have varying land use characteristics (e.g., mix of  
5  
6 low and high-density residential locations). Monitors are retrieved seven days after initiating the  
7  
8 measurements for data download and equipment cleaning in the field laboratory. The monitors are  
9  
10 then re-deployed 48 hours later at a new set of locations in a different geographic area, with the aim  
11  
12 of capturing potential microclimate and source-related differences between areas which likely impact  
13  
14 pollution. For the fixed sites, replacement monitors, replacement batteries, and memory cards are  
15  
16 swapped on site so as not to have a disruption in monitoring.  
17  
18  
19  
20  
21  
22

### 23 **Logistics and training**

24  
25  
26  
27 Our local field team comprises of three recent graduates from the University of Ghana and a taxicab  
28  
29 driver, all with technical training needed to manage the field operation. The team is given project  
30  
31 specific training to understand the site selection criteria and to collect high quality data. Additionally,  
32  
33 periodic field visits and regular phone calls by researchers are made to maintain high quality data. In  
34  
35 each neighbourhood or community, the team identifies and works with a community member to  
36  
37 establish trust and facilitate entry into that community.  
38  
39  
40  
41  
42

### 43 **Data handling**

44  
45  
46  
47  
48 Weekly data are downloaded, saved in triplicate onto two external hard drives, and a third copy  
49  
50 uploaded to a sever at Imperial College via an encrypted laptop. For the integrated PM<sub>2.5</sub> filter  
51  
52 samples, pre-labelled 0.2µm pore size 37mm barcoded Teflon membrane filters  
53  
54 (<https://mtlcorp.com/filters/>) are used and weighed pre- and post-sampling using an MTL AH500  
55  
56 automated robotic scale (<http://www.mtlcorp.com/#/filter-weighing/>) maintained in a temperature  
57  
58 and RH-controlled laboratory (23 ± 2 °C, 35 ± 2% RH) at The University of British Columbia. The  
59  
60

1 filter labels are scanned, time-stamped, placed in individual carriers, and loaded into the input silos  
2  
3  
4 for 48 hours to equilibrate to laboratory conditions before weighing. System generated weighing  
5  
6 reports (e.g. balance stability) for each filter are issued for quality control purposes. Samples are  
7  
8 weighed thrice in both pre- and post-weighing and the average of the three measured masses is used  
9  
10 for calculating concentrations. The pre-weighed filters are scanned and paired to and placed in  
11  
12 labelled petri-dishes which are then sealed into individual packages. Each petri-dish has four labels  
13  
14 used to match the filter to the cartridge, UPAS monitor, and field log sheet during field work. After  
15  
16 sampling, the filters are matched to, and placed back in, their corresponding petri-dishes and shipped  
17  
18 to the laboratory for post-weights. Detailed information on the filter handling process can be found  
19  
20 elsewhere [32]. An emerging low-cost image-based approach will be applied to the post-weighed  
21  
22 filters to estimate optical reflectance as a measure of black carbon (BC) concentration [43], the mass  
23  
24 related to light absorption due to the presence of carbonaceous species.  
25  
26  
27  
28

29 NO<sub>x</sub>/NO<sub>2</sub> samples are handled according to the protocol from Ogawa [44]. After assembly in the  
30  
31 laboratory, the loaded samplers contained in an airtight container are exposed only on site for the  
32  
33 entire sampling week. After sampling, the above procedure is again followed, and samples  
34  
35 refrigerated until the exposed pads are shipped in airtight shipping vials for laboratory analysis. The  
36  
37 final sample concentrations are determined based on the ratio of the sample absorbance (measured by  
38  
39 spectrometer) to the slope of a prepared standard curve. The full analytical method is publicly  
40  
41 available [44].  
42  
43  
44  
45  
46  
47

### 48 **Quality assurance and control**

49  
50  
51

52 Throughout the campaign, we will follow a set of procedures and protocols to uphold and assess the  
53  
54 quality of the data being generated. We follow the principles that all procedures should be carefully  
55  
56 planned, tested, and performed, the origin and life-course of all data must be traceable, and any  
57  
58 deviations or irregularities must be recorded. Throughout all data collection, documentation of  
59  
60

1  
2 sampling and conditions will be maintained in field notebooks. Furthermore, data collection logs will  
3  
4 be digitized and backed up electronically on hard-drives and an online server, which will be checked  
5  
6 on a daily basis for accuracy. The field team were given multiple weeks of project specific training  
7  
8 prior to the pilot measurements. The team were taught specific protocols for equipment handling and  
9  
10 cleaning, data inspection and cleaning, and equipment installation at measurement sites. The team  
11  
12 were also given hardcopies of the protocols and, in addition to field visits by researchers, had constant  
13  
14 remote access via phone/ web to project researchers throughout the campaign. In the supplementary  
15  
16 information, we have included further information on our precision and accuracy testing, protocol for  
17  
18 blank and duplicate collection, and data cleaning and inspecting procedures (SI 1).  
19  
20  
21  
22  
23  
24

## 25 **Modelling and analysis**

26  
27  
28  
29  
30  
31 The data from this measurement campaign will be used to characterize the spatial and temporal  
32  
33 patterns of air and noise pollution and serve as inputs into a diverse suite of state-of-the-art statistical,  
34  
35 physical and machine learning models to (i) predict pollution levels in high spatial and temporal  
36  
37 resolution across the GAMA, (ii) identify sources of pollution, and (iii) simulate the impacts of policy  
38  
39 scenarios on air pollution levels. Below are brief descriptions of some of our planned modelling and  
40  
41 analysis activities following data collection. Future results-based papers will describe the modelling  
42  
43 approaches in greater detail.  
44  
45  
46  
47  
48

### 49 Descriptive summaries of the spatial and temporal variations in air and noise pollution

50  
51  
52  
53 We will provide summary statistics and visuals of the spatial and temporal patterns (within- and  
54  
55 between-day, and seasonal) of air pollution ( $PM_{2.5}$ ,  $NO_2$ ) concentrations and average-based metrics  
56  
57 of noise pollution such as  $LA_{eq24hr}$ , day-time ( $L_{day}$ ), night-time ( $L_{night}$ ), and day-evening-night  
58  
59 weighted  $L_{den}$ . Additionally, we will include metrics which capture short-term and episodic sound  
60

1  
2 events such as the average maximum sound level and a novel metric that captures the percentage of  
3  
4 event-based sound (the Intermittency Ratio ( $IR_{24hr}$ ,  $IR_{day}$ ,  $IR_{night}$ )) [45].  
5  
6  
7

## 8 High-resolution modelling of air and noise pollution in the GAMA

9  
10  
11  
12  
13 The increasing availability of geospatial datasets with land use characteristics [46], road network  
14 information [47], and locations of interest (e.g., locations of schools and hospitals) [48], supports the  
15 development of land use regression (LUR) models to predict pollution levels for urban areas [49,50].  
16  
17 To date, most applications of LUR models for air and noise pollution have been in high income  
18 countries [13,14,49], with an emerging number in Asian cities and a limited number in African cities  
19 [12,51–53]. To generate high resolution estimates of air and noise pollution in the GAMA, we will  
20 build LUR models with spatial and temporal predictor variables. The models will also include terms  
21 that allow for the capturing of systematic temporal patterns, e.g. random intercepts for hour of the  
22 day or month of the year, and terms that use pollution levels at fixed sites to remove weekly temporal  
23 changes. The models will use year-long data on  $PM_{2.5}$ , BC,  $NO_2$ , and  $NO_x$  concentrations, aggregated  
24 to weekly average concentrations, and sound level metrics aggregated hourly ( $LAeq_{1hr}$ ) and daily  
25 ( $IR_{24hr}$ ). The  $LAeq$  metric will be modelled hourly so that within-day patterns of sound variation can  
26 be captured in the model and then model predictions can be used to construct  $LAeq_{24hr}$ ,  $L_{day}$ ,  $L_{night}$ ,  
27 and  $L_{den}$ . The specific temporal and spatial structures that are built into the models will be determined  
28 from the descriptive work.  
29  
30  
31  
32  
33  
34  
35  
36  
37  
38  
39  
40  
41  
42  
43  
44  
45  
46  
47

48 We will obtain spatial/ location-based predictor variables from publicly available sources (e.g.  
49 OpenStreetMap), government databases, and satellite imagery to collate data on transportation  
50 networks (e.g., road-type), land cover/land use, points of interest (e.g., traffic lights, restaurants), and  
51 green and blue spaces. We also have temporal information on meteorological conditions (e.g.,  
52 temperature, wind speed and direction, humidity) from local weather stations that co-located with 6  
53 fixed-site environmental monitors. Appropriate data checks will be done to ensure that model  
54  
55  
56  
57  
58  
59  
60

1  
2 assumptions are met along with 10-fold hold-out cross validation methods to assess model  
3  
4 performance in different parts of the city. Possible spatial autocorrelation in the data will be  
5  
6 investigated by generating variogram plots of the raw data and the model residuals.  
7

8  
9 We will be reporting the model results in the form of estimates that represent annual average levels  
10  
11 of  $PM_{2.5}$ ,  $NO_2$ ,  $NO_x$ ,  $L_{Aeq24hr}$ ,  $L_{den}$  and  $IR_{24hr}$ . We will also provide maps that show estimates that  
12  
13 are disaggregated by season (e.g. Harmattan and non-Harmattan for air pollution) and within day  
14  
15 (e.g., day vs night).  
16

17  
18  
19  
20 Identification of sources of air and noise pollution with imagery and audio  
21

22  
23  
24  
25 We will glean insights into the determinants and correlates of air and noise pollution (i.e., potential  
26  
27 sources) in both space and time by applying machine learning approaches, novel in the domain of  
28  
29 pollution research, to our time-lapse images collected every five minutes at the ~ 140 measurement  
30  
31 sites [54]. We will use Object Detection algorithms, implemented in a Convolution Neural Network  
32  
33 architecture, to identify predefined object classes within an image with a rectangular box bounding  
34  
35 their presence (Figure 6). We will modify pre-existing algorithms to include custom object classes  
36  
37 specific to our study context such as roadside cookstoves and street loudspeakers, and as determined  
38  
39 by the research team [55–58]. A sample set of pre-labelled images will be used to fine-tune a pre-  
40  
41 trained object detection algorithm to detect the objects of relevance to this study. The algorithm will  
42  
43 then be applied to all images collected during the campaign to produce a list of variables that can be  
44  
45 included as independent variables in models estimating the association of air and noise pollution  
46  
47 levels with the occurrence of these variables in high spatial-temporal resolution. This approach could  
48  
49 be extended to potential future applications such as estimating traffic flows (segmented by vehicle  
50  
51 type such as bicycles, cars and minivans whose average emissions vary) or to apply the model to new  
52  
53 sources of street level imagery data to identify correlates of air and noise pollution at unmeasured  
54  
55 locations across the city [54].  
56  
57  
58  
59  
60

1  
2 Similarly, machine learning models can be applied to the audio to classify different sound types and  
3  
4 identify sound sources. Some models can predict over 500 different sound types/ sources (e.g., dog  
5  
6 barking, ocean waves, car engine revving) and have been pre-trained on 2 million short audio clips  
7  
8 [59,60]. The recent wave of development of these models highlight advancements in this field,  
9  
10 however, the transferability of the available models (which have predominantly been trained on data  
11  
12 from high-income cities and countries [39,59,61]) to a setting such as Accra will have to be tested  
13  
14 and understood before put to use.  
15  
16

### 17 18 19 20 Air pollution impacts of policy and urban planning 21

22  
23  
24  
25 We plan to use deterministic process-based models of air pollution to estimate the air pollution  
26  
27 impacts of policies and urban planning decisions in Accra. Process based models such as  
28  
29 meteorological chemical transport and dispersion models [62–64] can provide quantitative estimates  
30  
31 of the air pollution impacts of different policy scenarios by modifying sources according to the  
32  
33 specific scenario. After minimizing errors in meteorological inputs by nudging to ECMWF  
34  
35 meteorological re-analysis data, the deterministic relationships between the model's emissions inputs  
36  
37 and concentration outputs will be used in conjunction with the measurement data to calibrate the  
38  
39 highly uncertain SSA emissions data. This relationship will be recreated using Gaussian process  
40  
41 emulation [65] to simulate the millions of model runs required for a Bayesian Monte Carlo calibration  
42  
43 [66] exercise, in which each run is weighted according to its output's agreement with the  
44  
45 measurements. The same weights are applied to the corresponding emissions inputs, producing a  
46  
47 distribution of emissions values, the modal value of which is taken as the calibrated input. Repeating  
48  
49 this at multiple model time-steps averages the calibration over the values of the many other varying  
50  
51 model inputs. The remaining measurements will then be used to validate the model's outputs, after it  
52  
53 is re-run with the calibrated emissions. Following validation, the model (if appearing to perform well)  
54  
55  
56  
57  
58  
59  
60

1  
2 can be used for ongoing policy and urban planning scenario testing exercises for emissions reduction  
3  
4 policies in Accra, and other SSA cities with similar source profiles.  
5  
6  
7

## 8 9 **PATIENT AND PUBLIC INVOLEMENT**

10  
11  
12  
13 No patients or members of the public were involved in this component of the study.  
14  
15  
16

## 17 18 **ETHICS AND DISSEMINATION**

19  
20  
21 This environmental study was deemed exempt from full ethics review at Imperial College London  
22 and the University of Massachusetts Amherst; it was approved by the University of Ghana Ethics  
23 Committee. While pollution sources (cars, roadside cookstoves and loudspeakers, etc.) are the targets  
24 of our field camera and audio recorders, bystanders in public places and their voices may sometimes  
25 be in the mix. Monitors are placed at a height (~ 4 meters and above) where faces are normally not  
26 recognizable in the images and conversations unintelligible in the audio. Further, the audio recorders  
27 record for only 10 seconds every 10 minutes. Extra precautions (e.g. blurring of faces in imagery) is  
28 taken to maintain privacy of bystanders.  
29  
30  
31  
32  
33  
34  
35  
36  
37  
38

39 Both public and private stakeholders and relevant civil society groups will be invited to annual  
40 research consortium meetings where preliminary and final results will be shared. This will enable  
41 policymakers to frame and understand impacts of current and future policy scenarios. Additionally,  
42 results will be presented at international conferences and published in peer-reviewed journals.  
43  
44  
45  
46  
47  
48  
49 Further, we will also engage with civil society through blog posts and other social media platforms.  
50  
51  
52  
53  
54  
55  
56  
57  
58  
59  
60



1  
2  
3  
4  
5  
6  
7  
8  
9  
10  
11  
12  
13  
14  
15  
16  
17  
18  
19  
20  
21  
22  
23  
24  
25  
26  
27  
28  
29  
30  
31  
32  
33  
34  
35  
36  
37  
38  
39  
40  
41  
42  
43  
44  
45  
46  
47  
48  
49  
50  
51  
52  
53  
54  
55  
56  
57  
58  
59  
60

## ACKNOWLEDGMENTS

We thank John Phillip Pearce for his role in the design and development of the integrated pollution monitoring equipment box. Thank you to the staff of the Physics Department at the University of Ghana for their assistance in setting up the laboratory.

For peer review only

## FIGURE LEGENDS

**Figure 1. The Greater Accra Metropolitan Area (GAMA) and locations of the fixed and computer-generated (sampled) rotating sites.** The road network data is from OpenStreetMap and the background land cover shapefile is from the World Bank (2014). The inset shows background maps of Africa and Ghana (ESRI), along with the GAMA boundary from Ghana Statistical Service.

**High-density residential** indicates neighborhoods with small, crowded, irregular buildings and narrow unidentifiable unpaved roads such as in shantytowns and slums. **Medium/ Low-density residential** indicates neighborhoods with small regular planned buildings and indicate formal residential areas. **Commercial/ business/ industrial** indicates neighborhoods with large buildings that can be used for commercial, industrial, office, or warehouse purposes. **Other** indicates areas with large spaces of vegetation (e.g., dense forest), barren land (e.g., sand, soil), or water bodies.

1  
2  
3  
4  
5  
6  
7  
8  
9  
10  
11  
12  
13  
14  
15  
16  
17  
18  
19  
20  
21  
22  
23  
24  
25  
26  
27  
28  
29  
30  
31  
32  
33  
34  
35  
36  
37  
38  
39  
40  
41  
42  
43  
44  
45  
46  
47  
48  
49  
50  
51  
52  
53  
54  
55  
56  
57  
58  
59  
60

**Figure 2. Timeline of measurement campaign.** Weekly measurements consist of continuous (PM<sub>2.5</sub> air concentration, noise levels, meteorological conditions, audio, and imagery) and integrated (PM<sub>2.5</sub> and NO<sub>x</sub> concentration) samples. We chose weekly integrated samples for PM<sub>2.5</sub> and NO<sub>x</sub> for logistical reasons (cost and time) as well as lessons from a previous study that showed relatively high temporal correlation between daily measurements [8].

For peer review only

1  
2  
3  
4  
5 **Figure 3. Images of environmental monitoring equipment.**  
6  
7  
8  
9  
10  
11  
12  
13  
14  
15  
16  
17  
18  
19  
20  
21  
22  
23  
24  
25  
26  
27  
28  
29  
30  
31  
32  
33  
34  
35  
36  
37  
38  
39  
40  
41  
42  
43  
44  
45  
46  
47  
48  
49  
50  
51  
52  
53  
54  
55  
56  
57  
58  
59  
60

For peer review only

1  
2  
3  
4  
5  
6  
7  
8  
9  
10  
11  
12  
13  
14  
15  
16  
17  
18  
19  
20  
21  
22  
23  
24  
25  
26  
27  
28  
29  
30  
31  
32  
33  
34  
35  
36  
37  
38  
39  
40  
41  
42  
43  
44  
45  
46  
47  
48  
49  
50  
51  
52  
53  
54  
55  
56  
57  
58  
59  
60

**Figure 4. Smoothed time series of minute-by-minute PM<sub>2.5</sub> from 15 co-located real-time Zefan monitors in Accra.** The levels were neither corrected for relative humidity or against integrated filter-based data.

For peer review only

1  
2  
3  
4  
5 **Figure 5. Deployment of the pollution measurement equipment.**  
6  
7  
8  
9  
10  
11  
12  
13  
14  
15  
16  
17  
18  
19  
20  
21  
22  
23  
24  
25  
26  
27  
28  
29  
30  
31  
32  
33  
34  
35  
36  
37  
38  
39  
40  
41  
42  
43  
44  
45  
46  
47  
48  
49  
50  
51  
52  
53  
54  
55  
56  
57  
58  
59  
60

For peer review only

1  
2  
3 **Figure 6. Illustration of how object detection models and street-level imagery can be combined**  
4 **from the Accra campaign data to identify potential correlates of air and noise pollution in the**  
5 **imagery.** Information recorded on the bottom of the images includes the date and time, camera name,  
6  
7  
8 and the ambient temperature.  
9  
10  
11  
12  
13  
14  
15  
16  
17  
18  
19  
20  
21  
22  
23  
24  
25  
26  
27  
28  
29  
30  
31  
32  
33  
34  
35  
36  
37  
38  
39  
40  
41  
42  
43  
44  
45  
46  
47  
48  
49  
50  
51  
52  
53  
54  
55  
56  
57  
58  
59  
60

For peer review only

## REFERENCES

- 1 UN. World Urbanization Prospects. 2018.  
<https://population.un.org/wup/Publications/Files/WUP2018-KeyFacts.pdf>
- 2 Lall SV, Henderson JV, Venables A. *Africa's cities: opening doors to the world*. Washington: : The World Bank 2017. doi:10.1596/978-1-4648-1044-2
- 3 Katoto PDMC, Byamungu L, Brand AS, *et al*. Ambient air pollution and health in Sub-Saharan Africa: Current evidence, perspectives and a call to action. *Environ Res* 2019;**173**:174–88. doi:10.1016/j.envres.2019.03.029
- 4 Petkova EP, Jack DW, Volavka-Close NH, *et al*. Particulate matter pollution in African cities. *Air Qual Atmos Heal* 2013;**6**:603–14. doi:10.1007/s11869-013-0199-6
- 5 World Health Organization. Ambient air pollution: a global assessment of exposure and burden of disease. 2016. <https://www.who.int/phe/publications/air-pollution-global-assessment/en/>
- 6 World Health Organization. Annual mean ambient PM2.5 (ug/m3) - from measurements, 2018 update. 2018.
- 7 Dionisio K, Rooney MS, Arku RE, *et al*. Within-neighborhood patterns and sources of particle pollution: mobile monitoring and geographic information system analysis in four communities in Accra, Ghana. *Environ Health Perspect* 2010;**118**:607–13. doi:10.1289/ehp.0901365
- 8 Dionisio K, Arku RE, Hughes AF, *et al*. Air Pollution in Accra Neighborhoods: Spatial, Socioeconomic, and Temporal Patterns. *Environ Sci Technol* 2010;**44**:2270–6. doi:10.1021/es903276s
- 9 Rooney MS, Arku RE, Dionisio KL, *et al*. Spatial and temporal patterns of particulate matter sources and pollution in four communities in Accra, Ghana. *Sci Total Environ* 2012;**435–436**:107–14. doi:10.1016/j.scitotenv.2012.06.077
- 10 Essandoh PK, Armah FA. Determination of ambient noise Levels in the main commercial area of Cape Coast. *Res J Environ Earth Sci* 2011;**3**:637–44.
- 11 Baloye DO, Palamuleni LG. A comparative land use-based analysis of noise pollution levels in selected urban centers of Nigeria. *Int J Environ Res Public Health* 2015;**12**:12225–46. doi:10.3390/ijerph121012225
- 12 Sieber C, Ragettli MS, Brink M, *et al*. Land use regression modeling of outdoor noise exposure in informal settlements in Western Cape, South Africa. *Int J Environ Res Public Health* 2017;**14**. doi:10.3390/ijerph14101262
- 13 Aguilera I, Foraster M, Basagaña X, *et al*. Application of land use regression modelling to assess the spatial distribution of road traffic noise in three European cities. *J Expo Sci Environ Epidemiol* 2015;**25**:97–105. doi:10.1038/jes.2014.61
- 14 Ragettli MS, Goudreau S, Plante C, *et al*. Statistical modeling of the spatial variability of environmental noise levels in Montreal, Canada, using noise measurements and land use characteristics. *J Expo Sci Environ Epidemiol* 2016;**26**:597–605. doi:10.1038/jes.2015.82
- 15 Kheirbek I, Ito K, Neitzel R, *et al*. Spatial variation in environmental noise and air pollution in New York City. *J Urban Heal* 2014;**91**:415–31. doi:10.1007/s11524-013-9857-0
- 16 Perron S, Plante C, Ragettli MS, *et al*. Sleep disturbance from road traffic, railways, airplanes and from total environmental noise levels in montreal. *Int J Environ Res Public Health* 2016;**13**. doi:10.3390/ijerph13080809
- 17 Clark C, Paunovic K. WHO environmental noise guidelines for the european region: A systematic review on environmental noise and cognition. *Int J Environ Res Public Health* 2018;**15**. doi:10.3390/ijerph15020285
- 18 Basner M, Babisch W, Davis A, *et al*. Auditory and non-auditory effects of noise on health. *Lancet* 2014;**383**:1325–32. doi:10.1016/S0140-6736(13)61613-X
- 19 Zakpala RN, Armah FA, Sackey BM, *et al*. Night-Time Decibel Hell: Mapping Noise Exposure Zones and Individual Annoyance Ratings in an Urban Environment in Ghana.



- 1  
2 *Scientifica (Cairo)* 2014;**2014**:1–11. doi:10.1155/2014/892105
- 3 20 Zhou Z, Dionisio KL, Verissimo TG, *et al.* Chemical characterization and source  
4 apportionment of household fine particulate matter in rural, peri-urban, and urban West  
5 Africa. *Environ Sci Technol* 2014;**48**:1343–51. doi:10.1021/es404185m
- 6 21 Breathelife. BreathLife: Accra, Ghana. 2016.[http://breathelife2030.org/breathelifecity/accra-](http://breathelife2030.org/breathelifecity/accra-ghana/)  
7 [ghana/](http://breathelife2030.org/breathelifecity/accra-ghana/) (accessed 12 Mar 2019).
- 8 22 Knott S, Gyamfi K. ‘If you complain they see you as evil’: Accra’s religious noise problem.  
9 *Guard.* 2019.[https://www.theguardian.com/cities/2019/mar/27/if-you-complain-they-see-](https://www.theguardian.com/cities/2019/mar/27/if-you-complain-they-see-you-as-evil-accras-religious-noise-problem)  
10 [you-as-evil-accras-religious-noise-problem](https://www.theguardian.com/cities/2019/mar/27/if-you-complain-they-see-you-as-evil-accras-religious-noise-problem) (accessed 17 May 2019).
- 11 23 Bediako-Akoto RDO. Noise Pollution: A country at Risk. Dly. Graph.  
12 2018;:1.<https://www.graphic.com.gh/features/opinion/noise-pollution-a-country-at-risk.html>  
13
- 14 24 Kaledzi I. Ghana asks mosques to turn down the noise and use WhatsApp for call to prayer.  
15 2018.[https://www.dw.com/en/ghana-asks-mosques-to-turn-down-the-noise-and-use-](https://www.dw.com/en/ghana-asks-mosques-to-turn-down-the-noise-and-use-whatsapp-for-call-to-prayer/a-43373007)  
16 [whatsapp-for-call-to-prayer/a-43373007](https://www.dw.com/en/ghana-asks-mosques-to-turn-down-the-noise-and-use-whatsapp-for-call-to-prayer/a-43373007)
- 17 25 Ghana Meteorological Agency. Ghana Meteorological Agency.  
18 [http://www.meteo.gov.gh/website/index.php?option=com\\_content&view=article&id=87:regi-](http://www.meteo.gov.gh/website/index.php?option=com_content&view=article&id=87:regional-weather-greater-accra-region&catid=42:24-hour-forecast-for-ghana&Itemid=62)  
19 [onal-weather-greater-accra-region&catid=42:24-hour-forecast-for-ghana&Itemid=62](http://www.meteo.gov.gh/website/index.php?option=com_content&view=article&id=87:regional-weather-greater-accra-region&catid=42:24-hour-forecast-for-ghana&Itemid=62)  
20 (accessed 6 Jul 2019).
- 21 26 Arku RE, Vallarino J, Dionisio KL, *et al.* Characterizing air pollution in two low-income  
22 neighborhoods in Accra, Ghana. *Sci Total Environ* 2008;**402**:217–31.  
23 doi:10.1016/j.scitotenv.2008.04.042
- 24 27 Boadi KO, Kuitunen M. Environmental and health impacts of household solid waste  
25 handling and disposal practices in Third World Cities: The case of the Accra Metropolitan  
26 Area, Ghana. *J Environ Health* 2005;**68**:32–6.
- 27 28 Songsore J, McGranahan G. Environment, wealth and health: towards an analysis of intra-  
28 urban differentials within the Greater Accra Metropolitan Area, Ghana. *Environ Urban*  
29 1993;:10–30.
- 30 29 GSS. Ghana Population and Housing Census.  
31 2010.<http://www.statsghana.gov.gh/nada/index.php/catalog/51>
- 32 30 World Bank. 2014 Land Cover Classification Of Accra, Ghana. 2014.  
33 <https://datacatalog.worldbank.org/dataset/c-2014-land-cover-classification-accra-ghana>
- 34 31 Volckens J, Quinn C, Leith D, *et al.* Development and evaluation of an ultrasonic personal  
35 aerosol sampler. *Indoor Air* 2017;**27**:409–16. doi:10.1111/ina.12318
- 36 32 Arku RE, Birch A, Shupler M, *et al.* Characterizing exposure to household air pollution  
37 within the Prospective Urban Rural Epidemiology ( PURE ) study. *Environ Int*  
38 2018;**114**:307–17. doi:10.1016/j.envint.2018.02.033
- 39 33 Pillarisetti A, Carter E, Rajkumar S, *et al.* Measuring personal exposure to fine particulate  
40 matter (PM 2.5) among rural Honduran women: A field evaluation of the Ultrasonic Personal  
41 Aerosol Sampler (UPAS). *Environ Int* 2019;**123**:50–3. doi:10.1016/j.envint.2018.11.014
- 42 34 Bulot FMJ, Johnston SJ, Basford PJ, *et al.* Long-term field comparison of the performances  
43 of multiple low-cost particulate matter sensors in an urban area. *Sci Rep* 2019;:1–16.  
44 doi:10.5281/ZENODO.2531601
- 45 35 Malings C, Tanzer R, Hauryliuk A, *et al.* Fine particle mass monitoring with low-cost  
46 sensors: Corrections and long-term performance evaluation. *Aerosol Sci Technol* 2019;**0**:1–  
47 15. doi:10.1080/02786826.2019.1623863
- 48 36 Sather M, Slonecker T, Mathew J, *et al.* Evaluation of ogawa passive sampling devices as an  
49 alternative measurement method for the nitrogen dioxide annual standard in El Paso, Texas.  
50 *Environ Monit Assess* 2007;**124**:211–21.
- 51 37 Rindleisch TC. A comparative evaluation of two sound level meters. 2018.  
52 doi:10.13140/RG.2.2.26395.31520
- 53 38 Hill AP, Prince P, Piña Covarrubias E, *et al.* AudioMoth: Evaluation of a smart open acoustic  
54 device for monitoring biodiversity and the environment. *Methods Ecol Evol* 2018;**9**:1199–  
55

211. doi:10.1111/2041-210X.12955
- 39 Fairbrass AJ, Firman M, Williams C, *et al.* CityNet—Deep learning tools for urban ecoacoustic assessment. *Methods Ecol. Evol.* 2018. doi:10.1111/2041-210X.13114
- 40 Xu M, Hong B, Jiang R, *et al.* Outdoor thermal comfort of shaded spaces in an urban park in the cold region of China. *Build Environ* 2019;**155**:408–20. doi:10.1016/j.buildenv.2019.03.049
- 41 Morguá J-A, Gacia E, Grossi C, *et al.* Atmospheric Carbon Dioxide variability at Aigüestortes, Central Pyrenees, Spain. *Reg Environ Chang* 2018;**19**:313–24. doi:10.1007/s10113-018-1443-2
- 42 Council of the European Union. Directive of The European Parliament and of The Council of 25 June 2002 relating to the assessment and management of environmental noise. 2002. <https://publications.europa.eu/en/publication-detail/-/publication/27d1a64e-08f0-4665-a258-96f16c7af072/language-en>
- 43 Jeronimo M, Stewart Q, Weakley AT, *et al.* Analysis of black carbon on filters by image-based reflectance. *Atmos Environ* 2020;**223**:117300. doi:10.1016/j.atmosenv.2020.117300
- 44 Ogawa. NO, NO<sub>2</sub>, NO<sub>x</sub> and SO<sub>2</sub> sampling protocol using the Ogawa sampler. 2006. [http://ogawausa.com/wp-content/uploads/2017/11/prono-noxno2so206\\_206\\_1117.pdf](http://ogawausa.com/wp-content/uploads/2017/11/prono-noxno2so206_206_1117.pdf)
- 45 Wunderli JM, Pieren R, Habermacher M, *et al.* Intermittency ratio: A metric reflecting short-term temporal variations of transportation noise exposure. *J Expo Sci Environ Epidemiol* 2016;**26**:575–85. doi:10.1038/jes.2015.56
- 46 Larkin A, Geddes JA, Martin R V., *et al.* Global land use regression model for nitrogen dioxide air pollution. *Environ Sci Technol* 2017;**51**:6957–64. doi:10.1021/acs.est.7b01148
- 47 Barrington-Leigh C, Millard-Ball A. The world's user-generated road map is more than 80% complete. *PLoS One* 2017;**12**:e0180698. doi:10.1371/journal.pone.0180698
- 48 GooglePlaces API. <https://developers.google.com/places/web-service/intro> (accessed 4 Mar 2020).
- 49 Hoek G, Beelen R, de Hoogh K, *et al.* A review of land-use regression models to assess spatial variation of outdoor air pollution. *Atmos Environ* 2008;**42**:7561–78. doi:10.1016/j.atmosenv.2008.05.057
- 50 Khan J, Ketznel M, Kakosimos K, *et al.* Road traffic air and noise pollution exposure assessment – A review of tools and techniques. *Sci Total Environ* 2018;**634**:661–76. doi:10.1016/j.scitotenv.2018.03.374
- 51 Lee M, Brauer M, Wong P, *et al.* Land use regression modelling of air pollution in high density high rise cities: A case study in Hong Kong. *Sci Total Environ* 2017;**592**. doi:10.1016/j.scitotenv.2017.03.094
- 52 He B, Heal MR, Reis S. Land-use regression modelling of intra-urban air pollution variation in China: Current status and future needs. *Atmosphere (Basel)* 2018;**9**:1–19. doi:10.3390/atmos9040134
- 53 Saraswat A, Apte JS, Kandlikar M, *et al.* Spatiotemporal land use regression models of fine, ultrafine, and black carbon particulate matter in New Delhi, India. *Environ Sci Technol* 2013;**47**. doi:10.1021/es401489h
- 54 Weichenthal S, Hatzopoulou M, Brauer M. A picture tells a thousand...exposures: Opportunities and challenges of deep learning image analyses in exposure science and environmental epidemiology. *Environ Int* Published Online First: 2018. doi:10.1016/j.envint.2018.11.042
- 55 Redmon J, Divvala S, Girshick R, *et al.* You Only Look Once: Unified, Real-Time Object Detection. *Proc 2016 IEEE Conf Comput Vis Pattern Recognit (CVPR 2016)* 2015;:779–88. doi:10.1109/CVPR.2016.91
- 56 Lin TY, Maire M, Belongie S, *et al.* Microsoft COCO: Common objects in context. *Lect Notes Comput Sci (including Subser Lect Notes Artif Intell Lect Notes Bioinformatics)* 2014;**8693 LNCS**:740–55. doi:10.1007/978-3-319-10602-1\_48
- 57 Liu W, Anguelov D, Erhan D, *et al.* SSD: Single shot multibox detector. *Lect Notes Comput*

- 1  
2 *Sci (including Subser Lect Notes Artif Intell Lect Notes Bioinformatics)* 2016;**9905**  
3 **LNCS:21–37**. doi:10.1007/978-3-319-46448-0\_2  
4 58 Kuznetsova A, Rom H, Alldrin N, *et al*. The Open Images Dataset V4: Unified image  
5 classification, object detection, and visual relationship detection at scale. 2018;;1–  
6 20.<http://arxiv.org/abs/1811.00982>  
7  
8 59 Garcia AL, *et al*. A Cloud-Based Framework for Machine Learning Workloads and  
9 Applications." *IEEE Access* 8. 2020.  
10 60 Gemmeke J, Ellis D, Freedman D, *et al*. Audio set: An ontology and human-labeled dataset  
11 for audio events. *IEEE ICASSP* 2017.  
12 61 Changsong Y, BARSIM KS, Kong Q, *et al*. Multi-level attention model for weakly supervised  
13 audio classification. *arXiv Prepr arXiv* Published Online First: 2018. doi:1803.02353  
14 62 Skamarock WC, Klemp JB. A time-split nonhydrostatic atmospheric model for weather  
15 research and forecasting applications. *J Comput Phys* 2008;**227**:3465–85.  
16 63 Byun DW, Schere KL. Review of the governing equations, computational algorithms, and  
17 other components of the models-3 Community Multiscale Air Quality (CMAQ) modeling  
18 system. *Appl Mech Rev* 2006;**59**:51–77. doi:Doi 10.1115/1.2128636  
19 64 Heist D, Isakov V, Perry S, *et al*. Estimating near-road pollutant dispersion: A model inter-  
20 comparison. *Transp Res Part D Transp Environ* 2013;**25**:93–105.  
21 doi:10.1016/j.trd.2013.09.003  
22 65 Beddows A V., Kitwiroon N, Williams ML, *et al*. Emulation and Sensitivity Analysis of the  
23 Community Multiscale Air Quality Model for a UK Ozone Pollution Episode. *Environ Sci*  
24 *Technol* 2017;**51**:6229–36. doi:10.1021/acs.est.6b05873  
25 66 Bergin MS, Milford JB. Application of Bayesian Monte Carlo analysis to a Lagrangian  
26 photochemical air quality model. *Atmos Environ* 2000;**34**:781–92. doi:10.1016/S1352-  
27 2310(99)00346-5  
28  
29  
30  
31  
32

### 33 **Author contributions**

34  
35  
36  
37 All the authors contributed to this work and have taken part in the academic discussion for writing  
38 the study protocol, drafting the article and revising it. SNC, ASA, MB, ME, JB, MT, AH, JM, ST,  
39 JN, JV, SA, EA, BB, RA gave substantial contributions to conception and design and acquisition of  
40 data. SNC, ASA, MB, ME, MT, RN, EM, JB, JW, AB, FK, SB, RA gave substantial contributions to  
41 the analysis plan for data; SNC, ASA, MB, ME, JB, RA drafted and revised the manuscript; and all  
42 authors reviewed the final version.  
43  
44  
45  
46  
47  
48  
49  
50  
51  
52

### 53 **Funding**

54  
55  
56  
57 This work is supported by the Pathways to Equitable Healthy Cities grant from the Wellcome Trust  
58 [209376/Z/17/Z]. SC is supported by a Canadian Institutes for Health Research (CIHR) PhD  
59  
60

1  
2 scholarship as well as an Imperial College President's PhD scholarship. The content of this  
3  
4 manuscript is solely the responsibility of the authors and does not necessarily represent the official  
5  
6 views of the funders.  
7  
8  
9

## 10 **Ethics Approval**

11  
12  
13  
14  
15 The study is primarily interested in pollution and features of the environment and was exempt from  
16  
17 seeking ethics approval at Imperial College London and the University of Massachusetts-Amherst  
18  
19 and was given ethical approval at the University of Ghana (ECH 149/ 18-19).  
20  
21  
22  
23

## 24 **Competing interests**

25  
26  
27  
28  
29 None  
30  
31  
32  
33  
34  
35  
36  
37  
38  
39  
40  
41  
42  
43  
44  
45  
46  
47  
48  
49  
50  
51  
52  
53  
54  
55  
56  
57  
58  
59  
60

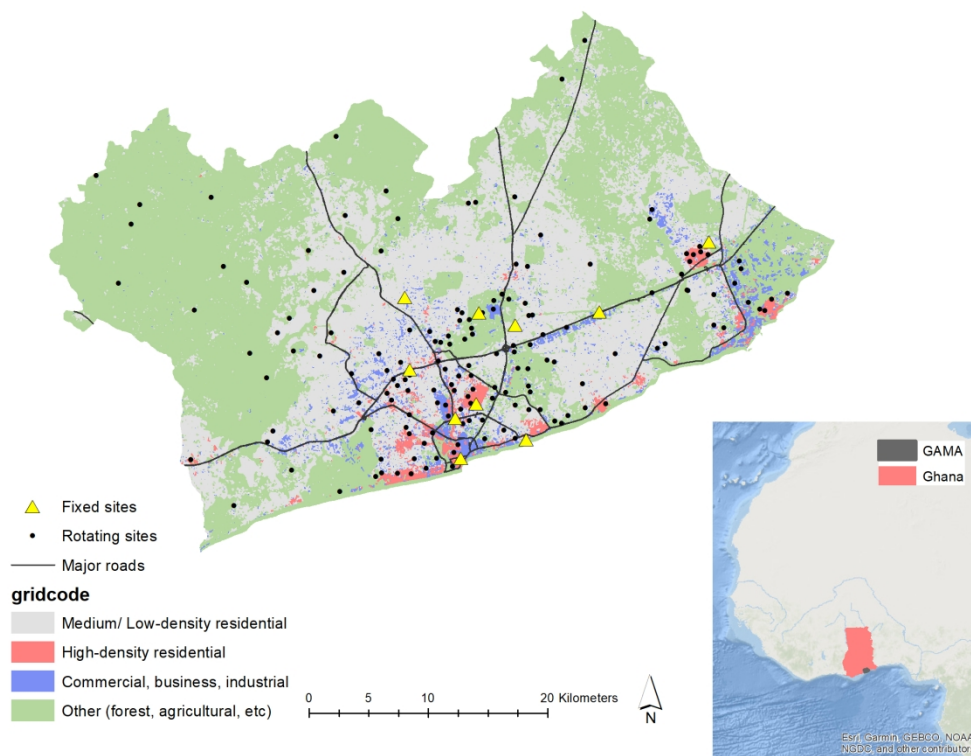

31  
32  
33  
34  
35  
36  
37  
38  
39  
40  
41  
42  
43  
44  
45  
46  
47  
48  
49  
50  
51  
52  
53  
54  
55  
56  
57  
58  
59  
60

Figure 1. The Greater Accra Metropolitan Area (GAMA) and locations of the fixed and computer-generated (sampled) rotating sites. The road network data is from OpenStreetMap and the background land cover shapefile is from the World Bank (2014). The inset shows background maps of Africa and Ghana (ESRI), along with the GAMA boundary from Ghana Statistical Service. High-density residential indicates neighborhoods with small, crowded, irregular buildings and narrow unidentifiable unpaved roads such as in shantytowns and slums. Medium/ Low-density residential indicates neighborhoods with small regular planned buildings and indicate formal residential areas. Commercial/ business/ industrial indicates neighborhoods with large buildings that can be used for commercial, industrial, office, or warehouse purposes. Other indicates areas with large spaces of vegetation (e.g., dense forest), barren land (e.g., sand, soil), or water bodies.

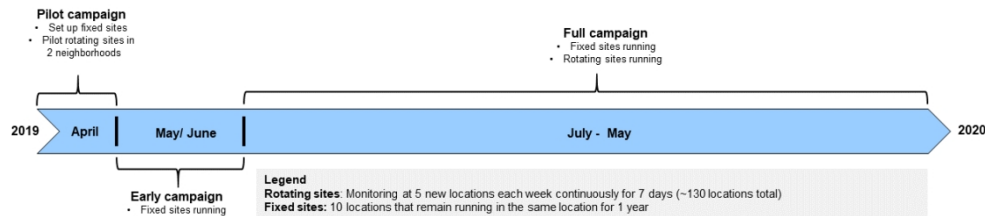

Figure 2. Timeline of measurement campaign. Weekly measurements consist of continuous (PM2.5 air concentration, noise levels, meteorological conditions, audio, and imagery) and integrated (PM2.5 and NOx concentration) samples. We chose weekly integrated samples for PM2.5 and NOx for logistical reasons (cost and time) as well as lessons from a previous study that showed relatively high temporal correlation between daily measurements [8].

1  
2  
3  
4  
5  
6  
7  
8  
9  
10  
11  
12  
13  
14  
15  
16  
17  
18  
19  
20  
21  
22  
23  
24  
25  
26  
27  
28  
29  
30  
31  
32  
33  
34  
35  
36  
37  
38  
39  
40  
41  
42  
43  
44  
45  
46  
47  
48  
49  
50  
51  
52  
53  
54  
55  
56  
57  
58  
59  
60

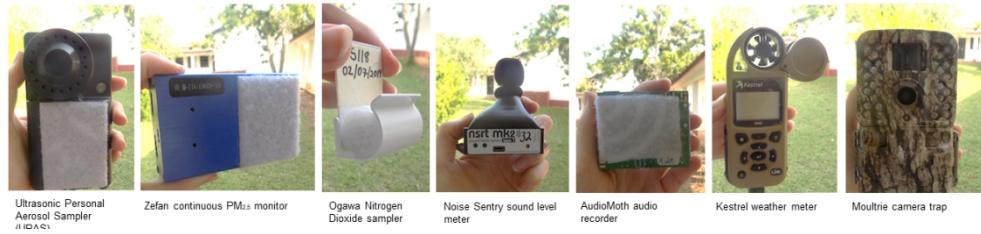

Figure 3. Images of environmental monitoring equipment.

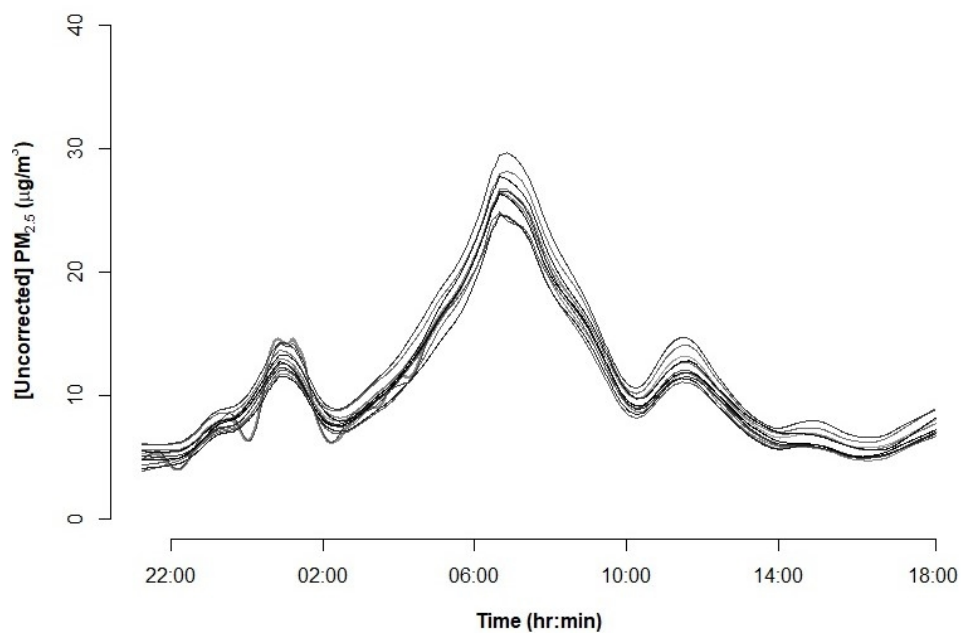

Figure 4. Smoothed time series of minute-by-minute PM<sub>2.5</sub> from 15 co-located real-time Zefan monitors in Accra. The levels were neither corrected for relative humidity or against integrated filter-based data.

210x144mm (96 x 96 DPI)



1  
2  
3  
4  
5  
6  
7  
8  
9  
10  
11  
12  
13  
14  
15  
16  
17  
18  
19  
20  
21  
22  
23  
24  
25  
26  
27  
28  
29  
30  
31  
32  
33  
34  
35  
36  
37  
38  
39  
40  
41  
42  
43  
44  
45  
46  
47  
48  
49  
50  
51  
52  
53  
54  
55  
56  
57  
58  
59  
60

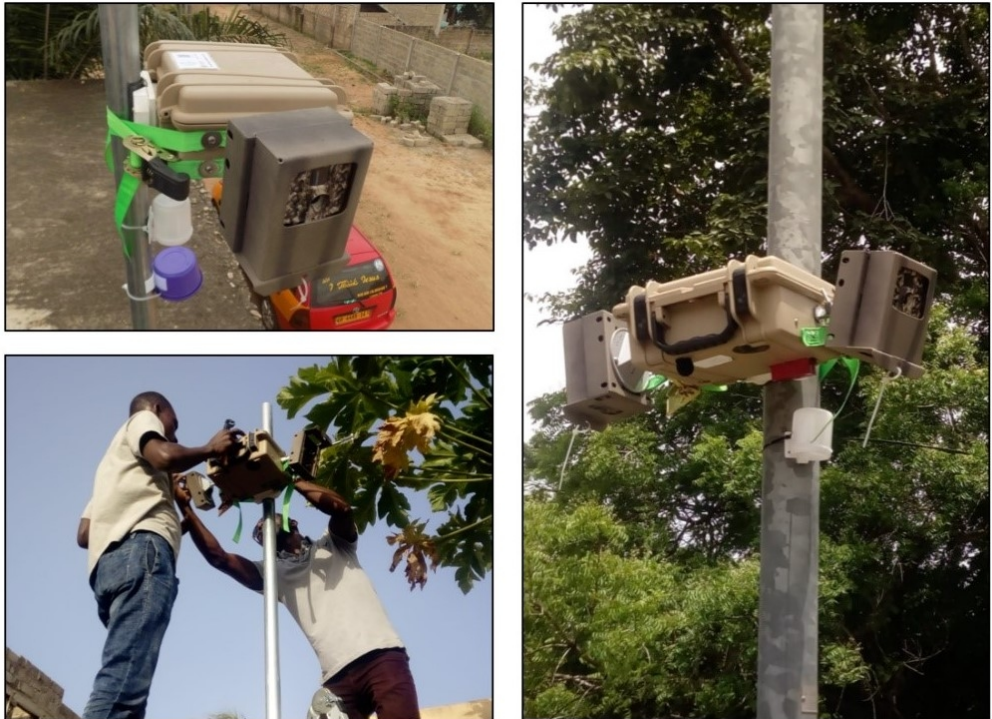

Figure 5. Deployment of the pollution measurement equipment.

265x195mm (96 x 96 DPI)

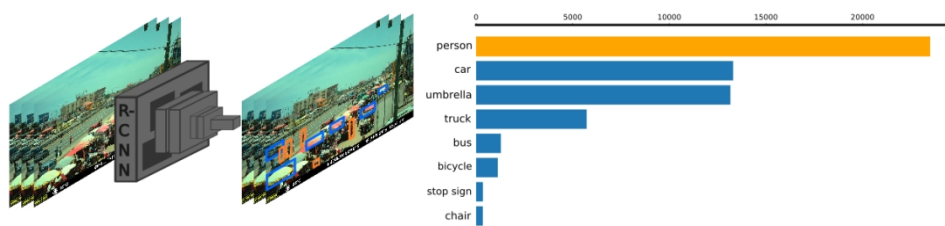

Figure 6. Illustration of how object detection models and street-level imagery can be combined from the Accra campaign data to identify potential correlates of air and noise pollution in the imagery. Information recorded on the bottom of the images includes the date and time, camera name, and the ambient temperature.

## High-resolution spatiotemporal measurement of air and environmental noise pollution in sub-Saharan African cities: Pathways to Equitable Health Cities Study protocol for Accra, Ghana

### Supplementary Information 1

#### Quality Assurance and Quality Control Protocol

The field team calibrate equipment prior to each use. Specifically, the UPAS mass flow sensor maintains a steady sampling flow rate over time by internally measuring changes in pressure drop across the filter media. But as part of our quality assurance process, the flow rates are manually checked with a TSI Mass Flowmeter (4000 Series) for possible flow drift prior to and immediately after each monitoring session. Monitors are adjusted as necessary prior to the next deployment. Following a previous protocol used in the same setting [1], samples will be considered valid only if the average flow rate is within 10% of the intended rate of 1 lpm, and the UPAS operated for  $\geq 85\%$  of the 7-day measurement period. Additionally, the SLMs are calibrated prior to each monitoring session with a CA114 sound calibrator at  $94.0 \text{ dB} \pm 0.3 \text{ dB}$  and  $1000\text{Hz} \pm 0.5\%$  (Convergence Instruments, Canada). If an instrument is consistently reading a calibration offset  $\pm 1 \text{ dBA}$ , the SLM is pulled out of commission and tested and the data from that session considered invalid.

In order to understand the extent of potential filter and diffusion pad contamination from handling procedures, we collect field blanks at 20% of our sites for filter based  $\text{PM}_{2.5}$  and  $\text{NO}_x$  and  $\text{NO}_2$  samples. Blank  $\text{PM}_{2.5}$  samples are prepared as regular samples in the field lab, brought to the field sites, and deployed in the same way as the regular sample, but without the pump being turned on.  $\text{NO}_x/\text{NO}_2$  blanks are brought to the field sites but not exposed to air in their sealed canisters. During analysis, information from the blank samples will be used to account for residual contamination from the laboratory work, transportation, and field handling processes, which in a previous study in Accra was minimal [1]. We will assess the mean absolute difference of the pre- and post-sampling weights of the blank samples; mean weights within 10 ug will be considered valid [1]. Also, final filters weights will be checked against the limit of detection, computed using the blanks, to be sure all valid samples are above this limit.

We will assess the accuracy and precision of our monitors by conducting **pre-campaign** side-by-side monitoring sessions between all our instruments of the same type (precision) and our instruments next to reference grade or higher-grade monitors (accuracy).

- Prior to field deployment, we tested minute-by-minute monitor-monitor precision for the continuous  $\text{PM}_{2.5}$  monitors by running all of our monitors alongside each other over a 24-hour period at the University of Ghana, Legon campus, with average relative humidity (RH) ( $\sim 78\%$ ) and temperature ( $29 \text{ }^\circ\text{C}$ ) representative of the city. The continuous  $\text{PM}_{2.5}$  measurements had good agreement and were within  $2\text{-}3 \text{ ug}/\text{m}^3$  of each other. The continuous  $\text{PM}_{2.5}$  ZeFan monitor uses the Plantower sensor (model PMS7003) which has been validated in previous studies against a TEOM 1400a analyser and tested for durations ranging from 6 months to a year in various environmental conditions [2,3].
- The filter-based UPAS monitor has been evaluated in previous laboratory and field settings against a federal reference monitor (URG-2000-30EGN-A; URG Corp., USA), personal environmental monitor (PEM 761 - 203; SKC, Inc., USA) and Harvard Impactors, respectively

1  
2  
3 and has proven valid for ambient, household, and personal monitoring in a typical tropical  
4 climate as our study [4–6].

- 5  
6 • Our pre-campaign tests of SLM monitor-monitor precision showed good agreement. There was  
7 only a 0.5 dBA difference between the monitoring period median values ( $LA_{eq1min}$ ) for 50%  
8 of monitors within the IQR bounds around the overall median (25%-75%) and a 1.7 dBA  
9 difference between the two monitors with the highest and lowest monitoring period median  
10 values. The monitor-monitor precision test was done in Accra and SLMs were exposed 16hrs  
11 to multiple sound environments similar to what we would expect during the full monitoring  
12 campaign. Our Type II Noise Sentry SLMs were also validated in a separate aircraft noise study  
13 conducted in San Francisco against a Type I industry standard instrument (DUO 01dB) [7],  
14 and the agreement was high (mean and median second by second difference between the  
15 instruments was -0.42 and -0.38 dBA, respectively).  
16  
17

18 In addition to the pre-campaign monitor-monitor precision tests and accuracy checks, we will collect  
19 duplicate samples at 20% of our sites and conduct **mid and post-campaign** precision tests to check  
20 their sensitivity over time and accuracy checks with reference grade monitors.  
21  
22

- 23 • To understand the extent to which each type of monitor provides consistent measurements  
24 among all the units used in the campaign, we are also collecting duplicate samples from co-  
25 located instruments at 20% of our rotating measurement sites. Duplicate samples will be  
26 evaluated from 20% of sites during the course of the campaign and faulty and malfunctioning  
27 instruments will be pulled from the field and data potentially removed from analysis if mean  
28 absolute difference between duplicate measurement is  $> 10 \mu\text{g}/\text{m}^3$  [1] or  $>2$  dBA ( $LA_{eq24hr}$ ).  
29  
30 • We will additionally co-locate all of our monitors side-by-side for mid and post campaign  
31 precision tests for a 1-week period to assess instrument drift over time. Data will be considered  
32 invalid if the mean absolute difference between daily/ weekly  $PM_{2.5}$  and  $LA_{eq24hr}$   
33 measurements differ by  $> 10 \mu\text{g}/\text{m}^3$  [1] or  $>2$  dBA.  
34  
35 • Since light-scattering techniques only infer PM mass from detecting particle number  
36 concentrations and are impacted by weather conditions (i.e. RH and temperature), their  
37 estimates of mass concentration are inexact. Thus, we will co-locate the ZeFan monitors with  
38 a U.S. federal equivalent continuous monitor Met One BAM 1020 at three sites, each with  
39 unique source influence in Accra for a week at the end of the campaign and adjust the minute-  
40 by-minute continuous PM records for impact of relative humidity and then their average against  
41 the co-located integrated  $PM_{2.5}$  concentrations from UPAS.  
42  
43

44 The real-time data will be inspected weekly by the field team as it is downloaded from the  
45 instruments. Potential implausible values will be identified by inspecting all values that are 5-  
46 standard deviations above or below the site and day (or week for filter-based  $PM_{2.5}$  and  $NO_x/NO_2$ )  
47 specific mean value. For the filter based  $PM_{2.5}$  data, potentially implausible values will be checked  
48 against the monitor run time, weighed mass value, and flow rate. The log sheets will be checked to  
49 see if any information on instrument malfunction or other irregularities was noted for the continuous  
50  $PM_{2.5}$  and SLM monitors. Values deemed erroneous will be dropped from analysis. Additionally,  
51 since monitors are swapped every week, sometimes an entire week of data might be erroneous if the  
52 instrument is malfunctioning or if calibration did not occur correctly. We will identify outlier weeks  
53 by plotting timeseries of a month worth of data to identify any potential implausible weeks of data  
54 and conduct instrument checks, review log sheets, and drop or correct data as needed. Finally, all  
55 real-time instruments will have their first 5 minutes of data dropped to allow the instruments to  
56 stabilize and the data further trimmed to match the exact monitoring session start and end date and  
57 time as recorded by the field team on the data log forms.  
58  
59  
60

## References

- 1 Dionisio K, Arku RE, Hughes AF, *et al.* Air Pollution in Accra Neighborhoods: Spatial, Socioeconomic, and Temporal Patterns. *Environ Sci Technol* 2010;**44**:2270–6. doi:10.1021/es903276s
- 2 Bulot FMJ, Johnston SJ, Basford PJ, *et al.* Long-term field comparison of the performances of multiple low-cost particulate matter sensors in an urban area. *Sci Rep* 2019;**1**:1–16. doi:10.5281/ZENODO.2531601
- 3 Malings C, Tanzer R, Hauryliuk A, *et al.* Fine particle mass monitoring with low-cost sensors: Corrections and long-term performance evaluation. *Aerosol Sci Technol* 2019;**0**:1–15. doi:10.1080/02786826.2019.1623863
- 4 Volckens J, Quinn C, Leith D, *et al.* Development and evaluation of an ultrasonic personal aerosol sampler. *Indoor Air* 2017;**27**:409–16. doi:10.1111/ina.12318
- 5 Arku RE, Birch A, Shupler M, *et al.* Characterizing exposure to household air pollution within the Prospective Urban Rural Epidemiology ( PURE ) study. *Environ Int* 2018;**114**:307–17. doi:10.1016/j.envint.2018.02.033
- 6 Pillarisetti A, Carter E, Rajkumar S, *et al.* Measuring personal exposure to fine particulate matter (PM 2.5) among rural Honduran women: A field evaluation of the Ultrasonic Personal Aerosol Sampler (UPAS). *Environ Int* 2019;**123**:50–3. doi:10.1016/j.envint.2018.11.014
- 7 Rindleisch TC. A comparative evaluation of two sound level meters. 2018. doi:10.13140/RG.2.2.26395.31520
